1 **Title: Primary cilia mediate diverse kinase inhibitor resistance mechanisms in**  
2 **cancer**

3  
4 Andrew D. Jenks<sup>1</sup>, Simon Vyse<sup>2</sup>, Jocelyn P. Wong<sup>2</sup>, Deborah Keller<sup>3</sup>, Tom Burgoyne<sup>4</sup>,  
5 Amelia Shoemark<sup>5</sup>, Maïke de la Roche<sup>6</sup>, Athanasios Tsalikis<sup>1</sup>, Martin Michaelis<sup>7</sup>, Jindrich  
6 Cinatl<sup>8</sup>, Paul H. Huang<sup>2</sup> and Barbara E. Tanos<sup>1</sup>§

7  
8  
9 <sup>1</sup>Division of Cancer Therapeutics, <sup>2</sup>Division of Cancer Biology, The Institute of Cancer  
10 Research, 237 Fulham Road, SW3 6JB, London, UK. <sup>3</sup>FILM, Sir Alexander Fleming  
11 Building, South Kensington Campus, Imperial College London, Exhibition Road, London  
12 SW7 2AZ, UK <sup>4</sup>UCL Institute of Ophthalmology, London, UK <sup>5</sup>Imperial College  
13 London, London, UK Electron Microscopy Department, Royal Brompton and Harefield  
14 NHS Foundation Trust, London, UK. <sup>6</sup>CRUK-Cambridge Research Institute, Cambridge  
15 CB2 0RE, UK. <sup>7</sup>Industrial Biotechnology Centre and School of Biosciences, University  
16 of Kent, Canterbury, UK. <sup>8</sup>Institute of Medical Virology, Goethe University Frankfurt,  
17 Paul-Ehrlich-Str. 40, 60596, Frankfurt am Main, Germany.

18  
19 § Correspondence: [barbara.tanos@icr.ac.uk](mailto:barbara.tanos@icr.ac.uk)

20  
21 **Abstract**

22 Primary cilia are microtubule-based organelles that detect mechanical and chemical  
23 stimuli. Although cilia house a number of oncogenic molecules (including Smoothed,  
24 KRAS, EGFR, and PDGFR), their precise role in cancer remains unclear. We have  
25 interrogated the role of cilia in acquired and *de novo* resistance to a variety of kinase  
26 inhibitors, and found that in several examples, resistant cells are distinctly characterized  
27 by an increase in the number and/or length of cilia with altered structural features.  
28 Changes in cilia length seem to be linked to the lack of recruitment of Kif7 and IFT81 to  
29 cilia tips, and result in enhanced hedgehog pathway activation. Notably, Kif7 knockdown  
30 is sufficient to confer drug resistance in drug sensitive cells. Conversely, targeting of  
31 cilia length or integrity through genetic and pharmacological approaches overcomes  
32 kinase inhibitor resistance. The identification of a broad mechanism of pathway-

33 unbiased drug resistance, represents a major advancement in oncology, and helps  
34 define a specific and important role for cilia in human cancer.

35

## 36 **Introduction**

37 Primary cilia are microtubule-based sensory organelles that detect mechanical and  
38 chemical stimuli, and are formed by nearly all vertebrate cells (Garcia-Gonzalo and  
39 Reiter, 2012). These antenna-like organelles house a number of oncogenic molecules  
40 including Smoothened, KRAS (Lauth et al., 2010), EGFR, and PDGFR (reviewed in  
41 (Christensen et al., 2012)). Although loss of cilia has been associated with the onset of  
42 malignancy in some human tumors (reviewed in (Basten and Giles, 2013)), in others,  
43 cilia appear to be necessary for cancer cell survival (Han et al., 2009),(Wong et al.,  
44 2009),(Li et al., 2016). In fact, depending on the nature of the driver oncogenic lesion,  
45 cilia can have opposing roles in tumorigenesis even in the same tumor type. For  
46 example, a study by Han *et al* (Han et al., 2009) showed that while removal of cilia  
47 prevented tumor growth in a mouse model of medulloblastoma (MB) driven by  
48 transgenic expression of a constitutively active form of Smoothened (Smo), the same  
49 perturbation in a MB model driven by expression of constitutively active GLI2 promoted  
50 tumor growth. Therefore, the role of cilia in cancer remains unclear, and is likely to be  
51 context dependent. Furthermore, characterization of primary cilia in glioblastoma cells  
52 suggest that cancer-associated cilia may be structurally distinct (Moser et al., 2014).  
53 A number of oncology drugs target cilia-resident proteins such as EGFR and PDGFR  
54 (Christensen et al., 2012). These drugs (e.g. the EGFR inhibitor erlotinib) promote  
55 significant tumor regressions in appropriate patient populations (e.g. EGFR-mutant non-  
56 small cell lung carcinoma patients). However, these responses are invariably followed  
57 by the emergence of lethal drug-resistant disease. Our understanding of the molecular

58 mechanisms of drug resistance has facilitated the design and deployment of second line  
59 therapies that can target drug-resistant tumors (Awada et al., 2015). However, the  
60 characterization of these mechanisms (particularly those that do not involve mutation of  
61 the drug target itself) has been limited, and specific to the individual target or drug.  
62 Thus, drug resistance remains the main obstacle in delivering long-lasting therapeutic  
63 benefit. The identification of cell biological processes that facilitate and support the  
64 emergence of drug resistance may provide new therapeutic opportunities with broad  
65 applicability.

66 In this study, we report that the number and length of primary cilia are upregulated both  
67 in *de novo* and acquired kinase inhibitor resistance. These changes are associated with  
68 distinct molecular features at the cilium, including 1) failure to recruit Kif7 and control  
69 cilia length, 2) increased Hedgehog pathway activation, and 3) cilia fragmentation. Cilia  
70 elongation via Kif7 knockdown is sufficient to increase survival in the presence of kinase  
71 inhibitors, thus suggesting that cilia elongation has a critical role in promoting drug  
72 resistance. Notably, targeting ciliary pathways or impairing ciliogenesis through  
73 downregulation of ciliary proteins can overcome resistance in all cases studied. Thus,  
74 we have uncovered a previously unrecognized role for cilia in cancer that provides a  
75 rationale for targeting ciliogenesis as a broadly applicable strategy to overcome drug  
76 resistance.

77

## 78 **Results**

79 The role of primary cilia in human cancer is ill-defined. Given the wide range of  
80 oncogenic proteins that are regulated by or localized to cilia (Christensen et al., 2012)  
81 (Lauth et al., 2010), we hypothesized that changes in ciliogenesis could play a  
82 permissive role in the emergence of drug resistance. First, we examined EGFR-inhibitor

83 resistance in the EGFR-mutant non-small cell lung carcinoma (NSCLC) cell line  
84 HCC4006. We chose this model system because EGFR inhibitors are effective in the  
85 treatment of EGFR-mutant lung cancer patients, but resistance to these drugs is  
86 inevitable. Furthermore, the mechanisms of drug resistance are still unknown for a large  
87 number of these patients. We examined ciliogenesis in these cells by staining for  
88 acetylated tubulin, a marker for cilia, or Arl13B, a marker specific for ciliary membranes  
89 (Casparly et al., 2007) (Cevik et al., 2010). Interestingly, whereas control HCC4006 cells  
90 completely lacked primary cilia, erlotinib-resistant HCC4006 cells generated by chronic  
91 exposure to erlotinib – ((Saafan et al., 2016) and Supplementary Fig.1A) showed robust  
92 staining for ciliary markers (Fig. 1A).

93

94 We then asked whether changes in ciliogenesis could be seen in additional models of  
95 drug resistance, where the primary target was not EGFR. To do this, we examined the  
96 Rhabdoid tumor cell line A204, which is exquisitely sensitive to the tyrosine kinase  
97 inhibitor dasatinib, and a dasatinib-resistant (DasR) subline which we recently  
98 characterized and was generated through chronic drug exposure ((Wong et al., 2016)  
99 and Supplementary Fig. 1E). Notably, we found that compared to parental cells, DasR  
100 cells showed increased cilia length and tip fragmentation (Fig. 1B-E). These effects  
101 were neither acute nor transient, as short term treatment with dasatinib did not promote  
102 these changes, and withdrawing dasatinib from DasR cells for several days did not  
103 revert the effect (Fig. 1F-I).

104 We also examined ciliation in the EML4-ALK-fusion-positive lung cancer cell line H2228,  
105 which is highly sensitive to the ALK inhibitor NVP-TAE684, and a drug-resistant  
106 derivative generated through chronic NVP-TAE684 exposure. Similar to HCC4006 and  
107 A204, drug resistant H2228 cells showed increased cilia length and number (Figure 3E-

108 G). Of the 5 isogenic models of acquired drug resistance we interrogated, only one  
109 (PC-9 lung adenocarcinoma cells) did not show alterations in cilia. In this model,  
110 however, cells with acquired resistance to the irreversible EGFR inhibitor afatinib  
111 showed a nearly complete biochemical insensitivity to the drug, consistent with the  
112 presence of a drug-binding-interfering mutation, a known and common mechanism of  
113 drug resistance (Wu et al., 2016). PC9 cells that were resistant to erlotinib exhibited  
114 drug-resistant MAPK activity, which has also been described as a mechanism of  
115 acquired EGFR inhibitor resistance in both PC9 cells and in lung cancer patients (de  
116 Bruin et al., 2014). Therefore, our models seem to cover a range of drug resistance  
117 mechanisms: Table 1 summarizes cilia changes identified in all models examined.

118

119 Cilia-derived vesicles have been shown to have important intercellular functions in  
120 tetrahymena and *Chlamydomonas* (Wang and Barr, 2016; Wood et al., 2013).  
121 However, cilia-derived fragments have never been described in cancer cells.

122

123 We therefore set out to characterize the nature of the observed cilia fragmentation in  
124 drug-resistant cells by examining tubulin post-translational modifications. No difference  
125 was observed in total tubulin acetylation, or detyrosination. However, the extent of  
126 tubulin polyglutamylation along the cilia was reduced in DasR cells (Supplementary Fig.  
127 2A-C). Furthermore, staining acetylated tubulin together with alpha-tubulin, to mark all  
128 microtubules, clearly showed a discontinuous axonemal pattern in DasR cells compared  
129 to control cells (Fig. 1J). In fact, through super-resolution microscopy, we find that these  
130 Arl13B-positive fragments (Fig. 1K) are completely surrounded by Arl13B-containing  
131 membrane (Fig. 1L).

132

133 Next, we wanted to understand the molecular nature of the longer cilia phenotype. The  
134 kinesin Kif7 has been shown to control cilia length by organizing the cilia tip in  
135 coordination with the IFT-B particle IFT81 (He et al., 2014). In fact, the changes in cilia  
136 length observed in DasR cells are reminiscent of those seen in Kif7-deficient cells,  
137 suggesting that Kif7 could be a mediator of this phenotype. We found that in control  
138 cells, Kif7 localized to the ciliary base, along the cilium, and at the cilium tip, as  
139 previously described (He et al., 2014) (Fig. 2A). In contrast, DasR cells had a significant  
140 decrease in Kif7 localization to the axoneme and no Kif7 localization to the cilia tip (Fig.  
141 2A) while total Kif7 levels remained unchanged (Fig. 2D). We also found that in control  
142 A204 cells, IFT81 localized along the axoneme and at the cilia tip. However, it was  
143 absent from the axoneme in DasR cells (Fig 2B). The microtubule plus-end-binding  
144 protein EB1, which localizes to centrioles and cilia tips (Pedersen et al., 2003), is also  
145 thought to play a role in cilia biogenesis (Schroder et al., 2011). We found that  
146 localization of EB1 was restricted to centrioles in control A204 cells, while in DasR cells,  
147 EB1 localized along the ciliary axoneme as well as the cilia tip (Fig. 2C, C'). Thus,  
148 control of cilia length and cilia tip compartment organization, as well as cilia transport  
149 appear compromised in DasR cells.

150 Kif7 inactivation has been shown to destabilize cilia (He et al., 2014). Thus, we tested  
151 the stability of cilia in DasR cells by subjecting them to cold treatment or the microtubule  
152 destabilizing agent nocodazole. Both treatments resulted in significantly shorter cilia in  
153 DasR cells compared to untreated controls (Supplementary Fig. 2D-E,F-G). Thus,  
154 elongated cilia in DasR cells are unstable. This is consistent with our observation that  
155 cilia in drug-resistant cells are less polyglutamylated (Supplementary Fig. 2C), a  
156 modification shown to regulate microtubule stability (O'Hagan et al., 2011).

157 Given these results, we hypothesized that Kif7 downregulation would promote cilia  
158 elongation and increase resistance to kinase inhibitors. Notably, downregulation of Kif7  
159 in drug-sensitive control cells, although growth inhibitory in the absence of drug,  
160 significantly increased resistance to Dasatinib (Fig. 2E), and caused the expected  
161 increase in cilia length (Fig. 2F, G, H). Conversely, overexpression of Kif7 promoted a  
162 decrease in cilia length (Fig. 2I, J).

163

164 Because drug resistance often involves aberrant activation of compensatory pathways  
165 (many of which reside in or are controlled by cilia), we hypothesized that the observed  
166 changes in cilia would lead to misregulated cilia-dependent signaling. Activation of the  
167 evolutionarily conserved Hedgehog (Hh) pathway requires a functional cilium, and it is  
168 coordinately regulated at the body of the cilium and the cilium tip (Goetz et al., 2009;  
169 Huangfu and Anderson, 2005). Hh signaling is critical during development and for tissue  
170 maintenance in the adult (Hooper and Scott, 2005), and is aberrantly activated in some  
171 cancers, where it serves as a therapeutic target (Pak and Segal, 2016). The Hh  
172 pathway is activated when Hh ligands (e.g. Sonic Hh (Shh)) bind the ciliary localized  
173 transmembrane receptor Patched (PTCH). This promotes PTCH removal from the  
174 cilium and relieves inhibition of the key signal transducer Smoothed (SMO). SMO  
175 moves into the cilium and activates GLI transcription factors leading to Hh-specific  
176 target gene transcription (Goetz et al., 2009). Given that changes in cilia tip  
177 organization, KIF7 defects, and changes in ciliogenesis have been shown to disrupt the  
178 Hedgehog pathway (He et al., 2014), we hypothesized that cilia changes in resistant  
179 cells might affect Hh function. We first examined SMO recruitment to the cilium following  
180 Shh stimulation (Fig. 3A). Fluorescence intensity quantification showed increased SMO  
181 recruitment to cilia in DasR cells compared to control cells (Fig. 3A,B). To assess the

182 functional relevance of this increase, we examined transcriptional targets of Hh-  
183 activation by RT PCR at steady state, and at different time points after addition of  
184 human Shh. We found significantly higher induction of the Hh target genes GLI1 and  
185 PTCH1 in response to either Shh (Fig. 3C, D) or the SMO agonist (SAG)  
186 (Supplementary Fig. 3) in DasR cells compared to A204 control cells, thereby  
187 confirming that the longer cilia observed in DasR cells support enhanced Hh pathway  
188 activation (Figure 3A-D). Consistently, lung cancer H2228 cells with acquired resistance  
189 to the ALK inhibitor NVP-TAE684, also showed increased Hedgehog pathway activation  
190 (seen as both a significant increase in ciliary localization of smoothed following  
191 receptor engagement (Fig.3H, I), and an increase in the levels of GLI1) compared to  
192 parental controls (Fig.3J). Additionally, we observed an increase in GLI2 levels in  
193 erlotinib-resistant HCC4006 cells compared to parental controls (Fig.3K).

194

195 Our results indicate that acquired resistance to kinase inhibitors is associated with the  
196 upregulation of a number of ciliogenesis pathways, and suggest that targeting cilia  
197 might be an effective strategy to overcome resistance. To test this hypothesis, we asked  
198 whether inhibition of ciliogenesis via knockdown of the centriole distal appendage  
199 protein SCLT1 (Tanos et al., 2013) or the IFT-B particle IFT88 (Pazour et al., 2000)  
200 could affect KIR cell viability. Notably, while in our 4 models of acquired drug resistance  
201 disrupting ciliogenesis did not significantly alter the cell cycle (Supplementary table 1),  
202 when combined with the appropriate kinase inhibitor (i.e. erlotinib, dasatinib, or NVP-  
203 TAE684) it significantly reduced viability in drug-resistant cells (Fig. 4A, Supplementary  
204 Fig. 5S, Fig. 4B). Furthermore, IFT88 knockdown in DasR cells significantly reduced  
205 anchorage-independent growth (Fig. 4C).

206



207 Next, we interrogated the impact of pharmacological targeting of cilia function on drug  
208 resistance. First, we focused on the Hh pathway because it is upregulated in DasR  
209 cells, and because it has previously been implicated in drug resistance (Faiao-Flores et  
210 al., 2017). Interestingly, we found that treatment with Gant61, a small molecule inhibitor  
211 of the Hh pathway (Lauth et al., 2007) reduced viability in both DasR and control cells  
212 (Supplementary Fig.3E), highlighting the broad therapeutic potential of targeting cilia  
213 function in cancer. Second, we targeted fibroblast growth factor receptor (FGFR)  
214 because it has been previously shown to control ciliogenesis and cilia length  
215 (Neugebauer et al., 2009). Accordingly, we found that treatment of erlotinib-resistant  
216 HCC4006 cells with the FGFR inhibitor BGJ398 significantly reduced cilia formation  
217 (Fig. 4D), and more importantly, it re-sensitized these cells to erlotinib (Fig. 4E). We  
218 found similar results when we evaluated FGFR inhibition in A204 DasR cells (Fig. 4F-  
219 G) and NVP-TAE684-resistant H2228 cells (Supplementary Fig. 6), suggesting that  
220 inhibition of cilia regulators such as FGFR may represent a good therapeutic strategy to  
221 overcome drug resistance in a variety of contexts.

222

223 Finally, to assess the scope of our findings, we wanted to know whether cilia changes  
224 similar to those in our models of acquired resistance were associated with any  
225 instances of *de novo* drug resistance.

226 In NSCLC, KRAS is targeted by activating mutations in 20-30% of the cases. However,  
227 direct targeting of RAS has been challenging. One approach to target RAS function has  
228 been to inhibit components of the downstream MAPK pathway, including MEK.

229 However, KRAS-mutant cells are largely refractory to these drugs. Two independent  
230 studies have found that in KRAS-mutant lung cancer cells, FGFR can mediate adaptive  
231 resistance to the MEK inhibitor, trametinib, (Kitai et al., 2016; Manchado et al., 2016).

232 We therefore hypothesized that MEK-inhibitor resistance in KRAS-mutant A549 cells  
233 would be accompanied by changes in ciliogenesis. Notably, we found that cilia number  
234 as well as cilia length were upregulated in A549 cells following trametinib treatment (Fig.  
235 4H-J), although changes in Hedgehog pathway activation were difficult to assess due to  
236 the significantly high level of basal activity (Supplementary Fig 4J-K). Additionally,  
237 KRAS-mutant NCI-H23 and NCI-1792 lung cancer cells also showed upregulated  
238 ciliogenesis and increased Hedgehog pathway activation (Supplementary Fig 4, Table  
239 1) in response to MEK inhibition. Furthermore, after 24 hours of drug treatment, the  
240 elongated cilia in A549 cells started to show evidence of fragmentation (Fig. 4H, J).  
241 Thus, release of terminal cilia- fragments might be a common feature of KIR cells  
242 independently of the molecular identity of the resistance pathway.  
243 Importantly, inhibiting ciliogenesis in all 3 KRAS-mutant lines reduced their viability  
244 when combined with trametinib (Figure 4, Supplementary Fig. 5), while having no  
245 significant changes in cell cycle distribution (Supplementary table 1) on its own.  
246 Furthermore, similar to our models of acquired kinase inhibitor resistance and  
247 consistent with previous reports (Kitai et al., 2016; Manchado et al., 2016), treatment  
248 with the FGFR inhibitor BGJ398 significantly reduced their viability in the presence of  
249 trametinib (Fig. 4L, M, Supplementary Figure 6).

250

251 These data support a model wherein inhibition of certain kinases leads to increased  
252 activation of FGFR (or other cilia promoting pathways), leading to enhanced ciliogenesis  
253 and concomitant hedgehog pathway activation, thus facilitating the generation of  
254 inhibitor insensitive survival signals (Fig. 4N). Cilia could thus function as a permissive  
255 platform for a number of drug resistance mechanisms with broad therapeutic  
256 implications.

257

258 **Discussion**

259 Our work has uncovered ciliogenesis and cilia function as key biological processes that  
260 play permissive roles in the emergence of resistance to kinase inhibitors in cancer cells.  
261 Although a large number of tumors show a decrease in the number of cilia or fail to  
262 produce primary cilia, our data show that resistance to a variety of targeted therapies in  
263 several experimental models is characterized by an increase in the number and length  
264 of primary cilia and by cilia fragmentation. The significance of these fragments is  
265 beyond the scope of this study, but it is important to note that they will likely add to the  
266 complexity of tumor heterogeneity.

267

268 Consistent with the notion that aberrant cilia can alter oncogenic signaling, we find that  
269 the local abundance of a number of cilia-associated oncoproteins changes in dasatinib  
270 resistant cells. For example, DasR cells lose PDGFR $\alpha$  expression (Supplementary Fig.  
271 1F, (Wong et al., 2016)), show a slight increase in FGFR1 (Supplementary Fig. 1G),  
272 and have increased ciliary localization of IGF-1R (Supplementary Fig. 1H).  
273 Furthermore, cilia elongation in resistant cells coincides with a decrease of Kif7/IFT81  
274 localization to cilia. In control cells, Kif7 is at the cilia tip, where it promotes microtubule  
275 plus-end catastrophe, thus creating a tip compartment for the enrichment of IFT81(He et  
276 al., 2014). In contrast, in DasR cells the Kif7-rich cilia tip compartment is lost, which  
277 explains the absence of IFT81. Thus, KIR cells have clearly defined molecular changes  
278 at the cilia tips. Additionally, we observed increased EB1 localization along the cilia and  
279 cilia-tips in KIR cells (Fig. 2C), which is suggestive of defective diffusion barrier control.  
280 Notably, downregulation of Kif7 in dasatinib-sensitive cells resulted in longer cilia and  
281 rendered these cells resistant to treatment.

282 Our results show that KIR cells have an enhanced response to Hedgehog pathway  
283 activation (Fig. 3, Supplementary Figure 3 and 4), and that DasR cells are sensitive to  
284 the Gli inhibitor Gant61 (Supplementary Fig. 3E), suggesting that drug resistance may  
285 be mediated by a critical effector of cilia-dependent signaling.

286 Interestingly, we and others have shown that resistance to both the MEK inhibitor  
287 trametinib and the tyrosine kinase inhibitor dasatinib can be mediated by activation of  
288 FGFR (Manchado et al., 2016) (Kitai et al., 2016) (Wong, Finetti et al. 2016) (this  
289 paper), a kinase known to regulate cilia length (Neugebauer et al., 2009). Notably, in all  
290 isogenic models studied, we found that treatment of KIR cells with an FGFR inhibitor not  
291 only restored kinase inhibitor sensitivity (Fig. 4, Supplementary fig 6), but also reduced  
292 cilia and/or cilia length (Fig. 4D, F, L). Similarly, targeting ciliogenesis through  
293 knockdown of the centriole distal appendage protein SCLT1 (Tanos et al., 2013) or the  
294 IFT particle IFT88 (Pazour et al., 2000) sensitized cells to the relevant kinase inhibitor.  
295 This is in contrast to the lack of sensitizing activity of therapeutic agents that cause  
296 growth arrest in specific phases of the cell cycle (i.e. cisplatin, rapamycin, or  
297 doxorubicin), which suggests that the sensitizing effects of ciliogenesis inhibition in  
298 drug-resistant cells are unlikely to be attributed to cell cycle deregulation  
299 (Supplementary Fig. 7). It is also unlikely that drug-resistance-associated changes in  
300 cilia are caused by alterations in cell cycle-dependent signals (Plotnikova et al., 2009),  
301 given that drug-resistant cells did not show any significant differences in cell cycle  
302 distribution compared to their parental counterparts (Supplementary Table 1).

303

304 Aurora A kinase is thought to be a critical factor for cilia disassembly (Pugacheva et al.,  
305 2007). However, we found no evidence of changes in Aurora A kinase activation in any  
306 of our isogenic models (not shown).

307

308 Of note, we have also examined ciliation in an A549 isogenic model of acquired  
309 chemoresistance, and found that resistance to Cisplatin and Vinflunine is also  
310 associated with a significant increase in ciliogenesis (Table 1, Supplementary Figure 8),  
311 suggesting that cilia might be involved in resistance to a wide range of therapeutic  
312 agents.

313

314 In summary, our study shows for the first time that aberrant ciliogenesis could serve as  
315 a functional platform for a variety of cancer drug resistance mechanisms (both *de novo*  
316 and acquired), and provides rationale for a broad therapeutic strategy to overcome  
317 resistance in a variety of settings.

318

319

## 320 **Acknowledgements**

321 We thank Carsten Janke (Institut Curie) for advice and reagents, Jacek Gaertik  
322 (University of Georgia), Kathryn Anderson (MSKCC) and Robert Blassberg (CRICK) for  
323 kindly sharing antibodies. Max Liebau (University of Cologne), Stephane Angers  
324 (University of Toronto) and Kathryn Anderson (MSKCC) for kindly donating Kif7  
325 expression plasmids. Special thanks to Marc Fivaz and Fredrik Wallberg from the ICR  
326 Imaging core. We thank Igor Vivanco (ICR) and Tony Magee (Imperial College London)  
327 for critically reading this manuscript.

328

## 329 **Methods**

### 330 **Cell culture**

331 Cells were maintained in DMEM (A549, A204 and the dasatinib resistant sub-line  
332 DasR), and DME/F12 (HCC4006) containing 10 % FBS, 4 mM GlutaMax (Thermo  
333 Scientific, Waltham, MA, USA), 500  $\mu$ g/ml Normocin (InvivoGen, San Diego, CA, USA),  
334 100 units/ml penicillin and 100 mg/ml streptomycin (Thermo Scientific). 5  $\mu$  M dasatinib  
335 (LC Labs, Woburn, MA, USA) was supplemented to DasR growth media. The erlotinib  
336 resistant HCC4006 sub-line was grown in the presence of 1  $\mu$  M erlotinib (LC Labs).  
337 NCI-H23 and NCI-H1792 were maintained in RPMI containing 10 % FBS, 2 mM  
338 GlutaMax (Thermo Scientific), 500  $\mu$ g/ml Normocin (InvivoGen), 100 units/ml penicillin  
339 and 100 mg/ml streptomycin (Thermo Scientific). NCI-H2228, PC9, A549 and the  
340 cisplatin, carboplatin and vinflunine resistant sub-lines were maintained in IMDM  
341 containing 10 % FBS, 2 mM GlutaMax (Thermo Scientific), 500  $\mu$ g/ml Normocin  
342 (InvivoGen), 100 units/ml penicillin and 100 mg/ml streptomycin (Thermo Scientific).  
343 The NVP TAE resistant NCI-H2228 sub-line was supplemented with 0.5  $\mu$ M NVP-  
344 TAE684 (Axon Medchem, Cat# Axon 1416). PC9 resistant sub-lines were cultured with  
345 2  $\mu$ M afatinib (Stratech Scientific, Cat# S1011-SEL) and 10  $\mu$ M erlotinib (LC Labs).  
346 A549 resistant sub-lines were cultured in 2  $\mu$ g/ml cisplatin (Cayman Chemical  
347 Company, Ann Arbor, MI, USA) and 10 $\mu$ g/ml carboplatin (Cayman Chemical Company).  
348 HEK-293T cells were maintained with DMEM containing 10 % FBS, 2 mM GlutaMax  
349 (Thermo Scientific), 100 units/ml penicillin and 100 mg/ml streptomycin (Thermo  
350 Scientific).

351

### 352 **Ciliogenesis experiments**

353 To induce cilia formation cells were plated on to polylysine coated coverslips in 3.5-cm  
354 plates at  $0.4 \times 10^6$  cells per well, allowed to attach for 24 hours then serum starved for  
355 48 hours. For A549, NCI-H23 and NCI-H1792, ciliogenesis experiments were carried

356 out in the presence of serum, since trametinib proved to be toxic otherwise. To activate  
357 the hedgehog pathway, cells were serum starved for 24 hours prior to the addition of 5  
358  $\mu$ g/ml Shh-N (Peprotech, London, UK) or 100 nM SAG (Millipore, Darmstadt,  
359 Germany). For cilia stability experiments, cells were either incubated in 4 ° C culture  
360 media or treated with 10  $\mu$  M nocodazole (Sigma-Aldrich, St. Louis, Missouri, USA).

361

### 362 **Immunofluorescence**

363 Cells were fixed in 4 % paraformaldehyde for 10 min at room temperature, for the  
364 following antibodies: mouse anti- $\alpha$ -tubulin (1:200, YL1/2: Bio-Rad MCA77G); mouse  
365 anti-acetylated tubulin (1:2000, 6-11B-1; Sigma T7451); rabbit anti-Arl13B (1:500,  
366 Proteintech 17711-1-AP); mouse anti-EB1 (1:250, BD biosciences 5/EB1); mouse anti-  
367 centrin (1:500, 3E6; Abnova H00001070-M01); rabbit anti-detyrosinated  $\alpha$ -tubulin  
368 (1:100, Abcam ab48389), rabbit anti-IGF-1R  $\beta$  (1:250, C-20; Santa Cruz sc-713),  
369 mouse anti-polyglutamylated tubulin (1:200, GT335; Adipogen AG-20B-0020) and rabbit  
370 anti-SMO (a kind gift by Kathryn Anderson, 1:500). An additional fixation step of 20 min  
371 in cold methanol was used for rabbit anti-IFT88 (1:500, Proteintech 13967-1-AP) and  
372 mouse anti- $\gamma$ -tubulin (1:500; TU-30; Santa Cruz sc-51715). For antibodies against Kif7  
373 (1:500, rabbit polyclonal, kind gift from Kathryn Anderson's lab) and rabbit anti-IFT81  
374 (1:200, Proteintech 11744-1-AP), cells were first permeabilized for 2 min in PTEM buffer  
375 (20 mM PIPES (pH 6.8), 0.2% Triton X-100, 10 mM EGTA, and 1 mM MgCl<sub>2</sub>) followed  
376 by fixation in cold methanol for 20 mins. After fixation, cells were permeabilized for 5  
377 min in 0.1% Triton X-100 in PBS, then blocked with 3% (w/v) bovine serum albumin in  
378 PBS, 0.1% Triton X-100 for 5 min. Primary antibodies were diluted in blocking solution  
379 and incubated for 1h followed by 3 washes with PBS, 0.1% Triton X-100. After that, goat  
380 secondary antibodies conjugated to either Alexa Fluor 488, 594 or 680 (1:500 dilution;

381 Thermo Scientific) were incubated for 1h followed by 3 washes and incubation with  
382 DAPI (Thermo Scientific).

383

### 384 **Image acquisition and analysis**

385 Fluorescent images were acquired on an upright microscope (Axio Imager M2, Zeiss)  
386 equipped with 100x oil objectives, 1.4 NA, a camera (ORCA R2, Hamamatsu Photonics)  
387 and a computer with image processing software (Zen). Images were quantified for pixel  
388 density and cilia length using ImageJ and Matlab and assembled into figures using  
389 Photoshop (CS5, Adobe). 3D structured illumination images were acquired using an  
390 SR1 Elyra PS1 microscope (Zeiss), images were processed using the ImageJ plugin  
391 SIMcheck to remove artifacts and 3D videos were made using the Volocity software  
392 (PerkinElmer). For Matlab quantifications, we used a custom-written script to quantify  
393 fluorescent intensity profiles along cilia. Cilia were segmented in a user-interactive  
394 manner using the improfile function from Matlab. Improfile retrieves the intensity values  
395 of pixels along a multiline path defined by the user. Acetylated tubulin was used to  
396 define the cilium path and intensity profiles were retrieved from channels of interest for  
397 Kif7, IFT81 and EB1. To reduce noise, we measured the average fluorescent intensity  
398 of 3 pixels (above, on and below the path) for each position along the cilium. To  
399 compare intensity profiles along cilia of different lengths we divided cilium length into 10  
400 bins and extracted the average fluorescent intensity for each bin. The script is available  
401 upon request.

402

### 403 **Western Blots**

404 Cells were lysed in RIPA buffer (Sigma-Aldrich) supplemented with protease and  
405 phosphatase inhibitors (Thermo Scientific) on ice. Lysates were sonicated and cleared



406 by centrifugation at 12000g at 4 °C for 30 mins. Samples were separated by SDS PAGE  
407 on 3 - 8 % polyacrylamide gradient gels followed by transfer to nitrocellulose  
408 membranes. Membranes were probed with primary antibodies against mouse anti-Erk  
409 (1:1000; 3A7; Cell Signaling 9107), rabbit anti-phospho-Erk (1:1000; Cell Signaling  
410 9101), rabbit anti-Met (1:1000; D1C2; Cell signaling 8198), rabbit anti-phospho-Met  
411 (1:1000; D26; Cell Signaling 3077), rabbit anti-EGFR (1:1000; D38B1; Cell Signaling  
412 4267), rabbit anti-phospho-EGFR (1:1000; D7A5; Cell Signaling 3777), rabbit anti-Gab1  
413 (1:1000; Cell Signaling 3232), rabbit anti-phospho-Gab1 (1:1000; C32H2; Cell Signaling  
414 3233), mouse anti-GLI1 (1:750; L42B10; Cell Signaling 2643), rabbit anti-phospho-  
415 FRS2- $\alpha$  (1:500; Cell Signaling 3864), rabbit anti-GLI2 (1:500; H-300; Santa Cruz sc-  
416 28674), mouse anti-FLAG (1:1000; M2; Sigma F1804), rabbit anti-IGF-1R  $\beta$  (1:250; C-  
417 20; Santa Cruz sc-713), rabbit anti-Kif7 (1:500), rabbit anti-SCLT1 (1:500; Sigma  
418 HPA036560) mouse anti- $\beta$ -Actin (1:2000; AC-74; Sigma A5316), mouse anti-Aurora-A  
419 Kinase (1:500; 4/IAK1; BD Bioscience 610939), rabbit anti-PDGFR  $\alpha$  (1:500; D1E1E;  
420 Cell Signaling 3174), rabbit anti-FGFR1 (1:1000; Abcam EPR806Y), rabbit anti-IFT81  
421 (1:500; Proteintech 11744-1-AP) mouse anti-EB1 (1:500; BD biosciences 5/EB1), rabbit  
422 anti-IFT88 (1:500; Proteintech 13967-1-AP), mouse anti- $\alpha$ -tubulin (1:1000; 236-10501;  
423 A11126 Thermo Scientific); mouse anti-vinculin (1:2000; hVIN-1; Sigma V9131) and  
424 mouse anti-transferrin receptor (1:500; H68.4; Thermo Scientific 136890), secondary  
425 antibodies were HRP conjugated rabbit or mouse anti-IgG antibodies (1:2000; Cell  
426 Signaling).

427

#### 428 **siRNA gene knockdown**

429 siRNA mediated IFT88 knockdown was carried out using two pooled sequences 5'-  
430 CGACUAAGUGCCAGACUCAUU-3' and 5'-CCGAAGCACUUAACACUUA-3' previously

431 described (Robert et al., 2007), when indicated, or a SMARTpool ON-TARGETplus  
432 siRNA (GE Dharmacon, Lafayette, CO, USA). SCLT1 knockdown was achieved using a  
433 siGENOME Smartpool siRNA (GE Dharmacon). Kif7 was downregulated using a  
434 SMARTpool ON-TARGETplus siRNA (GE Dharmacon). Cells were transfected with  
435 Lullaby (Oz Biosciences, San Diego, CA, USA) (three sequential transfections) or  
436 Lipofectamine RNAimax for the Smartpool (two sequential transfections). Non-targeting  
437 (control) siRNA was purchased from Qiagen (#1027281).

438

### 439 **Plasmids and transfections**

440 The human full-length FLAG-Kif7 construct was a kind gift from Dr Max Liebau,  
441 University of Cologne, Germany. Cells were transfected with Lipofectamine 3000  
442 (Thermo Scientific).

443 All lentiviruses were generated by transient co-transfection of 293T cells with packaging  
444 and envelope vectors using PEI transfection reagent. The TRIPZ inducible human  
445 shIFT88 plasmid (GE Dharmacon), was used for stable IFT88 gene knockdown. H23  
446 cells were selected for using 2 µg/ml puromycin

447

### 448 **Cell viability assays**

449 4000 cells/well (2000 cells/well for A204/DasR) were seeded in to a 96 well plate  
450 (Greiner Bio-One, Kremsmunster, Austria) and incubated for 24 hours at 37 Celsius  
451 degrees, 5% CO<sub>2</sub>. After that, media (5 % FBS) containing drugs or vehicle controls was  
452 added to the cells and incubated for an additional 72 hours. Cell viability was measured  
453 using Cell Titer Glo (Promega), using a Victor X5 2030 Multilabel plate reader (Perkin  
454 Elmer). Cisplatin was obtained from Cayman Chemical Company, doxorubicin from LC  
455 Labs and rapamycin from Calbiochem (San Diego, CA, USA).

456

### 457 **Cell cycle analysis**

458 To determine the cell cycle distribution, DNA content was assessed using propidium  
459 iodide (PI) staining. Cells were trypsinised and fixed in ice cold 70 % ethanol then  
460 stained with 20  $\mu$ g/ml PI and 100  $\mu$ g/ml RNAase A for 30 mins. Samples were run using  
461 a BD LSR II flow cytometer (BD Biosciences) and FlowJo to analyse results.

462

### 463 **Hedgehog pathway quantitative Reverse Transcription PCR**

464 RNA was extracted using RNA mini kit (Thermo Scientific). Primers and TaqMan probes  
465 for detection of human Tata binding protein (TBP), GLI1, and PTCH1 were purchased  
466 as Assays-on-Demand from Applied Biosystems (TBP: Hs00427620\_m1, GLI1:  
467 Hs01110766\_m1, PTCH1: Hs00181117\_m1). SuperScript III Platinum One-Step qRT-  
468 PCR System (Invitrogen) was used for the qPCR (PCR protocol: 15 min 50°C, 2 min  
469 95°C, 30-50x 15sec 95°C and 1 min 60°C). The amount of amplicon generated during  
470 the PCR was measured using a QuantStudio 6 Flex Real-Time PCR System (Applied  
471 Biosystems). Each sample was run in triplicate; controls without reverse transcriptase  
472 gave no signal in all samples.

473

### 474 **Soft agar assay**

475 Each well of a 6 well dish was coated with 1-ml base layer containing 0.6% agar  
476 (Sigma-Aldrich). Cells were dissociated and filtered through 30  $\mu$  m filter and sub-  
477 cultured by layering 1 x 10<sup>4</sup> viable cells in 1.5 ml culture medium (5 % FBS) containing  
478 0.3% agar over replicate base layers. An upper layer of 2ml culture medium (5 % FBS)  
479 was applied to each well and changed every 3 days. Colonies were counted using  
480 Gelcount (Oxford Optronix).

481

482 **Statistical tests**

483 Statistical analyses and samples sizes are specified in the figure legends. The error

484 bars indicate either standard deviation or standard error.

485

486

487 Awada, G., Kourie, H.R., and Awada, A.H. (2015). Novel mechanisms and approaches in the  
488 medical therapy of solid cancers. *Discovery medicine* 20, 33-41.

489 Basten, S.G., and Giles, R.H. (2013). Functional aspects of primary cilia in signaling, cell  
490 cycle and tumorigenesis. *Cilia* 2, 6.

491 Boehlke, C., Kotsis, F., Patel, V., Braeg, S., Voelker, H., Bredt, S., Beyer, T., Janusch, H.,  
492 Hamann, C., Godel, M., *et al.* (2010). Primary cilia regulate mTORC1 activity and cell size  
493 through Lkb1. *Nat Cell Biol* 12, 1115-U1126.

494 Caspary, T., Larkins, C.E., and Anderson, K.V. (2007). The graded response to Sonic  
495 Hedgehog depends on cilia architecture. *Dev Cell* 12, 767-778.

496 Cevik, S., Hori, Y., Kaplan, O.I., Kida, K., Toivenon, T., Foley-Fisher, C., Cottell, D., Katada, T.,  
497 Kontani, K., and Blacque, O.E. (2010). Joubert syndrome Arl13b functions at ciliary  
498 membranes and stabilizes protein transport in *Caenorhabditis elegans*. *J Cell Biol* 188, 953-  
499 969.

500 Christensen, S.T., Clement, C.A., Satir, P., and Pedersen, L.B. (2012). Primary cilia and  
501 coordination of receptor tyrosine kinase (RTK) signalling. *J Pathol* 226, 172-184.

502 de Bruin, E.C., Cowell, C., Warne, P.H., Jiang, M., Saunders, R.E., Melnick, M.A., Gettinger, S.,  
503 Walther, Z., Wurtz, A., Heynen, G.J., *et al.* (2014). Reduced NF1 expression confers  
504 resistance to EGFR inhibition in lung cancer. *Cancer Discov* 4, 606-619.

505 Faiao-Flores, F., Alves-Fernandes, D.K., Pennacchi, P.C., Sandri, S., Vicente, A.L.,  
506 Scapulatempo-Neto, C., Vazquez, V.L., Reis, R.M., Chauhan, J., Goding, C.R., *et al.* (2017).  
507 Targeting the hedgehog transcription factors GLI1 and GLI2 restores sensitivity to  
508 vemurafenib-resistant human melanoma cells. *Oncogene* 36, 1849-1861.

509 Garcia-Gonzalo, F.R., and Reiter, J.F. (2012). Scoring a backstage pass: mechanisms of  
510 ciliogenesis and ciliary access. *J Cell Biol* 197, 697-709.

511 Goetz, S.C., Ocbina, P.J., and Anderson, K.V. (2009). The primary cilium as a Hedgehog signal  
512 transduction machine. *Methods Cell Biol* 94, 199-222.

513 Han, Y.G., Kim, H.J., Dlugosz, A.A., Ellison, D.W., Gilbertson, R.J., and Alvarez-Buylla, A.  
514 (2009). Dual and opposing roles of primary cilia in medulloblastoma development. *Nature*  
515 *medicine* 15, 1062-U1114.

516 He, M., Subramanian, R., Bangs, F., Omelchenko, T., Liem, K.F., Jr., Kapoor, T.M., and  
517 Anderson, K.V. (2014). The kinesin-4 protein Kif7 regulates mammalian Hedgehog  
518 signalling by organizing the cilium tip compartment. *Nature cell biology* 16, 663-672.

519 Hooper, J.E., and Scott, M.P. (2005). Communicating with Hedgehogs. *Nature reviews*  
520 *Molecular cell biology* 6, 306-317.

521 Huangfu, D., and Anderson, K.V. (2005). Cilia and Hedgehog responsiveness in the mouse.  
522 *Proceedings of the National Academy of Sciences of the United States of America* 102,  
523 11325-11330.

- 524 Kitai, H., Ebi, H., Tomida, S., Floros, K.V., Kotani, H., Adachi, Y., Oizumi, S., Nishimura, M.,  
525 Faber, A.C., and Yano, S. (2016). Epithelial-to-Mesenchymal Transition Defines Feedback  
526 Activation of Receptor Tyrosine Kinase Signaling Induced by MEK Inhibition in KRAS-  
527 Mutant Lung Cancer. *Cancer Discov* 6, 754-769.
- 528 Lauth, M., Bergstrom, A., Shimokawa, T., and Toftgard, R. (2007). Inhibition of GLI-mediated  
529 transcription and tumor cell growth by small-molecule antagonists. *Proceedings of the*  
530 *National Academy of Sciences of the United States of America* 104, 8455-8460.
- 531 Lauth, M., Bergstrom, A., Shimokawa, T., Tostar, U., Jin, Q., Fendrich, V., Guerra, C., Barbacid,  
532 M., and Toftgard, R. (2010). DYRK1B-dependent autocrine-to-paracrine shift of Hedgehog  
533 signaling by mutant RAS. *Nat Struct Mol Biol* 17, 718-725.
- 534 Li, L., Grausam, K.B., Wang, J., Lun, M.P., Ohli, J., Lidov, H.G., Calicchio, M.L., Zeng, E.,  
535 Salisbury, J.L., Wechsler-Reya, R.J., *et al.* (2016). Sonic Hedgehog promotes proliferation of  
536 Notch-dependent monociliated choroid plexus tumour cells. *Nature cell biology* 18, 418-  
537 430.
- 538 Manchado, E., Weissmueller, S., Morris, J.P.t., Chen, C.C., Wullenkord, R., Lujambio, A., de  
539 Stanchina, E., Poirier, J.T., Gainor, J.F., Corcoran, R.B., *et al.* (2016). A combinatorial strategy  
540 for treating KRAS-mutant lung cancer. *Nature* 534, 647-651.
- 541 Moser, J.J., Fritzler, M.J., and Rattner, J.B. (2014). Ultrastructural characterization of primary  
542 cilia in pathologically characterized human glioblastoma multiforme (GBM) tumors. *BMC*  
543 *clinical pathology* 14, 40.
- 544 Neugebauer, J.M., Amack, J.D., Peterson, A.G., Bisgrove, B.W., and Yost, H.J. (2009). FGF  
545 signalling during embryo development regulates cilia length in diverse epithelia. *Nature*  
546 458, 651-654.
- 547 O'Hagan, R., Piasecki, B.P., Silva, M., Phirke, P., Nguyen, K.C., Hall, D.H., Swoboda, P., and  
548 Barr, M.M. (2011). The tubulin deglutamylase CCPP-1 regulates the function and stability of  
549 sensory cilia in *C. elegans*. *Curr Biol* 21, 1685-1694.
- 550 Pak, E., and Segal, R.A. (2016). Hedgehog Signal Transduction: Key Players, Oncogenic  
551 Drivers, and Cancer Therapy. *Dev Cell* 38, 333-344.
- 552 Pazour, G.J., Dickert, B.L., Vucica, Y., Seeley, E.S., Rosenbaum, J.L., Witman, G.B., and Cole,  
553 D.G. (2000). *Chlamydomonas* IFT88 and its mouse homologue, polycystic kidney disease  
554 gene *tg737*, are required for assembly of cilia and flagella. *J Cell Biol* 151, 709-718.
- 555 Pedersen, L.B., Geimer, S., Sloboda, R.D., and Rosenbaum, J.L. (2003). The Microtubule plus  
556 end-tracking protein EB1 is localized to the flagellar tip and basal bodies in  
557 *Chlamydomonas reinhardtii*. *Curr Biol* 13, 1969-1974.
- 558 Plotnikova, O.V., Pugacheva, E.N., and Golemis, E.A. (2009). Primary cilia and the cell cycle.  
559 *Methods Cell Biol* 94, 137-160.
- 560 Pugacheva, E.N., Jablonski, S.A., Hartman, T.R., Henske, E.P., and Golemis, E.A. (2007). HEF1-  
561 dependent Aurora A activation induces disassembly of the primary cilium. *Cell* 129, 1351-  
562 1363.
- 563 Robert, A., Margall-Ducos, G., Guidotti, J.E., Bregerie, O., Celati, C., Brechot, C., and  
564 Desdouets, C. (2007). The intraflagellar transport component IFT88/polaris is a  
565 centrosomal protein regulating G1-S transition in non-ciliated cells (vol 120, pg 628, 2006).  
566 *Journal of Cell Science* 120, 918-918.
- 567 Saafan, H., Foerster, S., Parra-Guillen, Z.P., Hammer, E., Michaelis, M., Cinatl, J., Jr., Volker, U.,  
568 Frohlich, H., Kloft, C., and Ritter, C.A. (2016). Utilising the EGFR interactome to identify  
569 mechanisms of drug resistance in non-small cell lung cancer - Proof of concept towards a  
570 systems pharmacology approach. *European journal of pharmaceutical sciences : official*  
571 *journal of the European Federation for Pharmaceutical Sciences* 94, 20-32.

572 Schroder, J.M., Larsen, J., Komarova, Y., Akhmanova, A., Thorsteinsson, R.I., Grigoriev, I.,  
573 Manguso, R., Christensen, S.T., Pedersen, S.F., Geimer, S., *et al.* (2011). EB1 and EB3  
574 promote cilia biogenesis by several centrosome-related mechanisms. *J Cell Sci* 124, 2539-  
575 2551.

576 Tanos, B.E., Yang, H.J., Soni, R., Wang, W.J., Macaluso, F.P., Asara, J.M., and Tsou, M.F. (2013).  
577 Centriole distal appendages promote membrane docking, leading to cilia initiation. *Genes &*  
578 *development* 27, 163-168.

579 Wang, J., and Barr, M.M. (2016). Ciliary Extracellular Vesicles: Txt Msg Organelles. *Cell Mol*  
580 *Neurobiol* 36, 449-457.

581 Wong, J.P., Todd, J.R., Finetti, M.A., McCarthy, F., Broncel, M., Vyse, S., Luczynski, M.T.,  
582 Crosier, S., Ryall, K.A., Holmes, K., *et al.* (2016). Dual Targeting of PDGFRalpha and FGFR1  
583 Displays Synergistic Efficacy in Malignant Rhabdoid Tumors. *Cell reports* 17, 1265-1275.

584 Wong, S.Y., Seol, A.D., So, P.L., Ermilov, A.N., Bichakjian, C.K., Epstein, E.H., Jr., Dlugosz, A.A.,  
585 and Reiter, J.F. (2009). Primary cilia can both mediate and suppress Hedgehog pathway-  
586 dependent tumorigenesis. *Nature medicine* 15, 1055-1061.

587 Wood, C.R., Huang, K., Diener, D.R., and Rosenbaum, J.L. (2013). The cilium secretes  
588 bioactive ectosomes. *Curr Biol* 23, 906-911.

589 Wu, S.G., Liu, Y.N., Tsai, M.F., Chang, Y.L., Yu, C.J., Yang, P.C., Yang, J.C., Wen, Y.F., and Shih, J.Y.  
590 (2016). The mechanism of acquired resistance to irreversible EGFR tyrosine kinase  
591 inhibitor-afatinib in lung adenocarcinoma patients. *Oncotarget* 7, 12404-12413.

592  
593  
594  
595

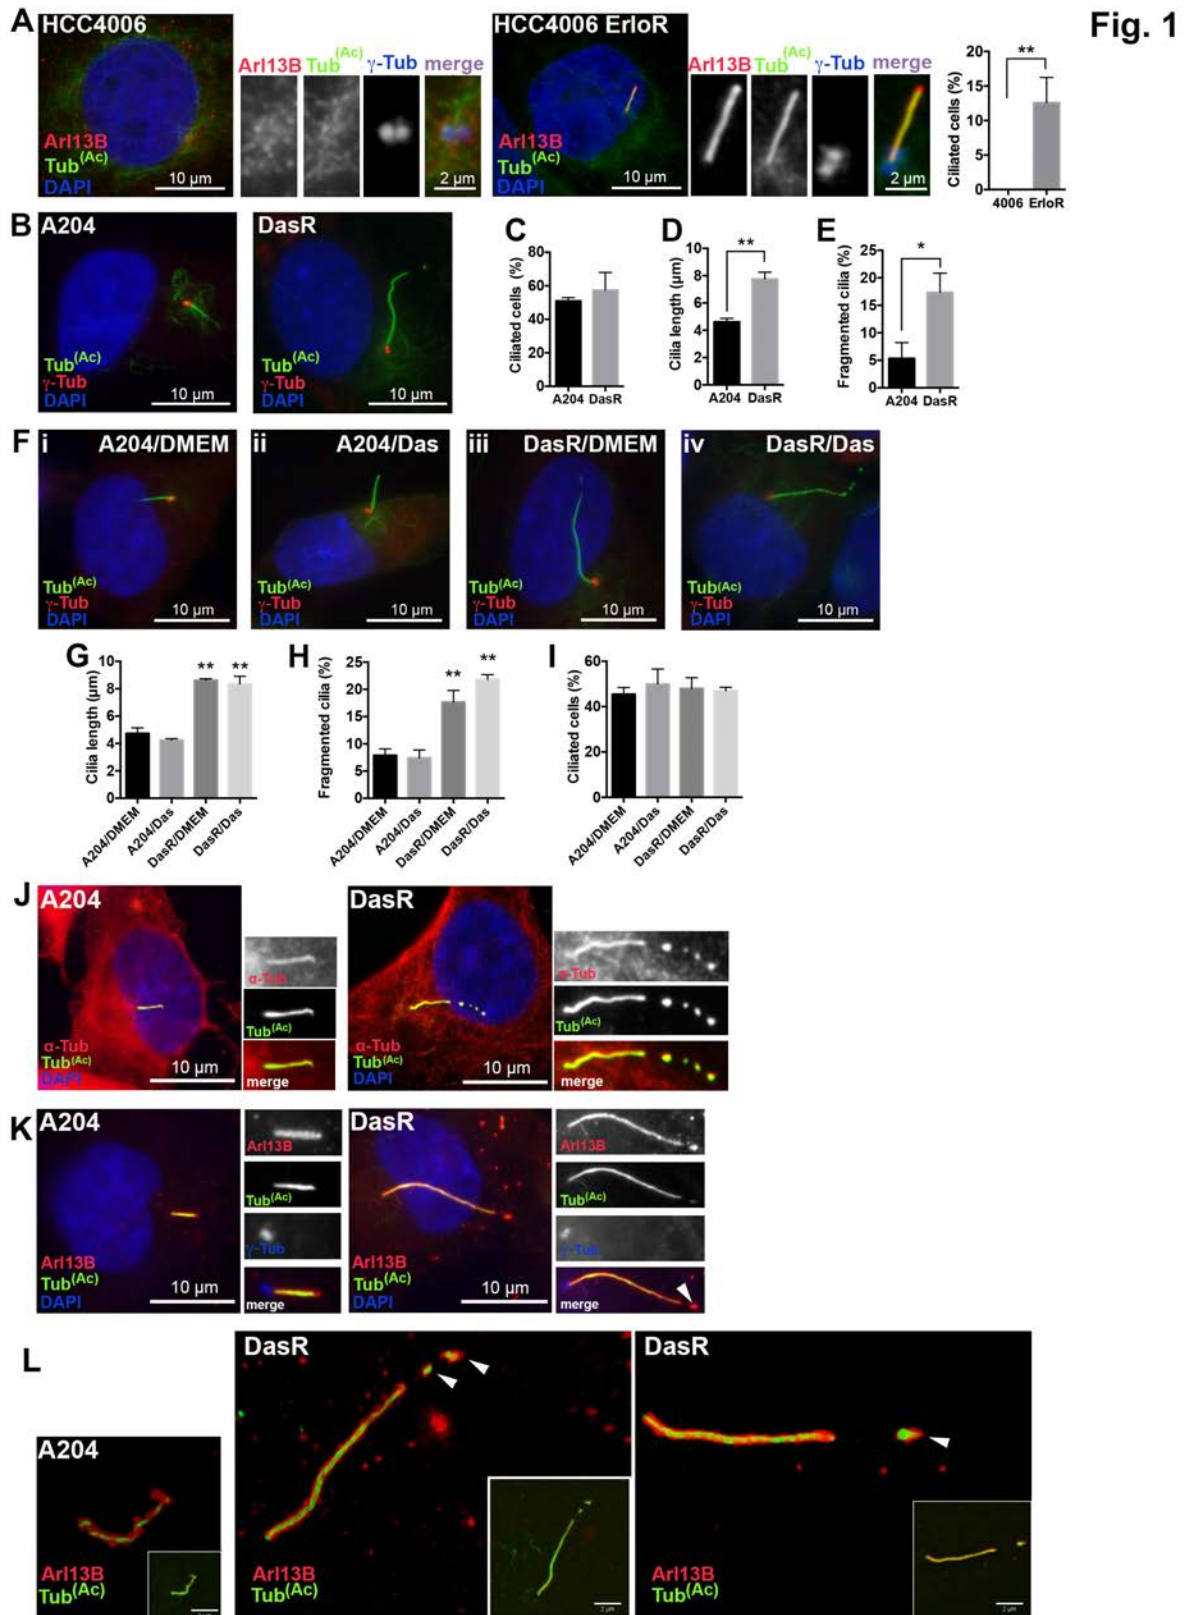

596

597 **Figure 1. Acquired resistance to kinase inhibitors in patient-derived tumor cell**

598 **lines shows increased cilia frequency, cilia length and cilia-tip fragmentation.**

599 **(A)** Control (left panels) or erlotinib resistant (ErloR) (right panels) HCC4006 lung-  
600 adenocarcinoma cells were serum starved for 48 hours to induce ciliogenesis, then  
601 fixed and stained with antibodies for acetylated tubulin (green) and Arl13B (red) to mark  
602 cilia,  $\gamma$ -tubulin (blue/inset) for centrioles and 4, 6-diamidino-2-phenylindole (DAPI)  
603 (blue) to mark DNA. Note that primary cilia were absent from HCC4006 cells but  
604 surprisingly are present in the erlotinib-resistant subline. Quantification of ciliated cells is  
605 shown on the right.  $n = 300$ . Error bars represent s.d.  $p < 0.005$ , unpaired T test.

606 **(B)** Rhabdoid tumor A204 cells (left panel), or a dasatinib resistant (DasR) subline  
607 (right panel) were stained with acetylated tubulin to mark cilia (green),  $\gamma$ -tubulin (red)  
608 and with DAPI (blue).

609 **(C)** Cilia quantification for the experiment shown in **B** ( $n = 300$ ).

610 **(D, E)** Cilia length ( $n = 150$ ) and cilia fragmentation ( $n = 150$ ) for the experiment shown  
611 in **B**. Note that DasR cells show increased cilia length and cilia fragmentation. Error  
612 bars represent the s.d.  $p < 0.0007$  for **D** and  $p < 0.011$  for **E**, unpaired T test.

613 **(F)** A204 or DasR cells were grown in DMEM (i, iii) or DMEM+dasatinib (ii, iv) for 48  
614 hours, then serum starved with (ii, iv) or without (i, iii) dasatinib for 48 hours and  
615 stained with acetylated tubulin (green),  $\gamma$ -tubulin (red) and with DAPI (blue).

616 **(G)** Quantification of primary cilia length, **(H)** cilia fragmentation and **(I)** percentage of  
617 ciliated cells shown in **F**.  $n = 150$  cilia. The error bars represent the s.d.  $p < 0.0001$  for G  
618 and H, Tukey's multiple comparison test, statistical significance calculated by comparing  
619 DasR/DMEM and DasR/Das to A204/DMEM and A204/Das.

620 **(J)** A204 (left) or DasR (right) cells were serum starved to induce ciliogenesis, then fixed  
621 and stained for  $\alpha$ -tubulin (red) to mark all microtubules, acetylated tubulin (green) for  
622 cilia and DAPI for DNA (blue). Note that  $\alpha$ -tubulin is present along the entire cilium



623 axoneme in both A204 and DasR cells and it follows cilia fragmentation in DasR cells  
624 (right).  
625 (K) A204 (left) or DasR cells (right) were stained with Arl13B for ciliary membranes  
626 (red), acetylated tubulin (green),  $\gamma$ -tubulin (blue/inset) and DAPI (blue). Arrow indicates  
627 cilia fragments marked by both acetylated tubulin and Arl13B in DasR cells.  
628 (L) 3D structured illumination images of A204 and DasR cilia; Arl13B is shown in red  
629 and acetylated tubulin in green. Note that at this resolution, Arl13B signal surrounds  
630 acetylated tubulin. Arrows indicate budding fragments in DasR cells that contain  
631 membrane around them, suggesting an active budding event.  
632 These data are representative of three independent experiments.  
633  
634

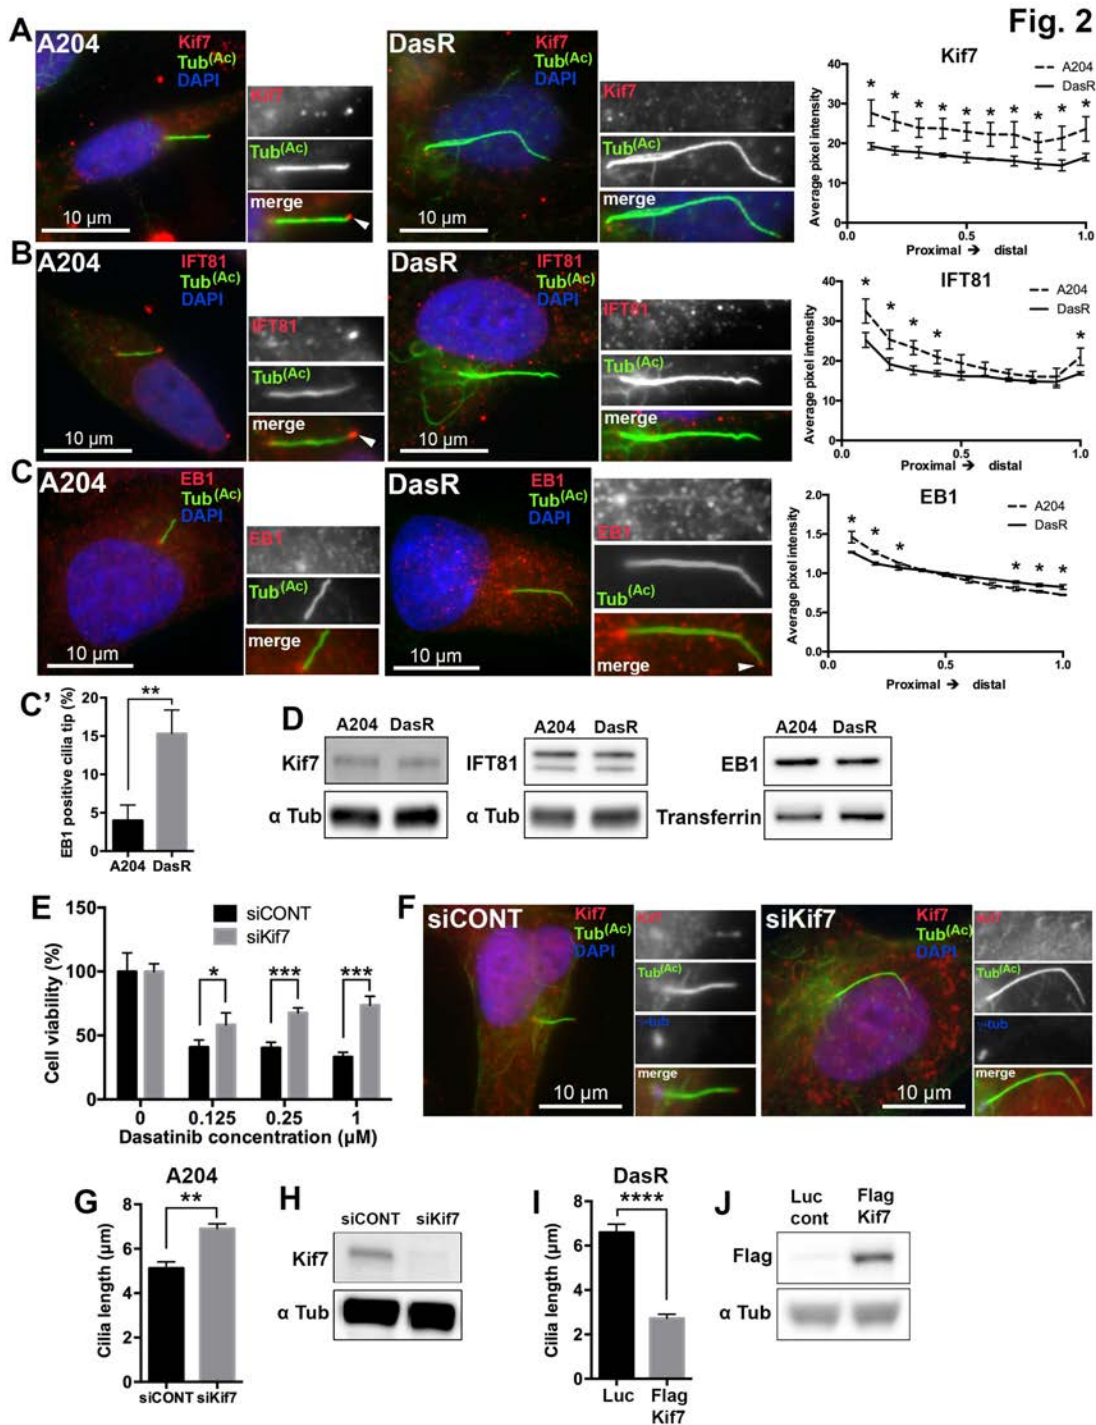

635  
636

637 **Figure 2. Cilia length control is critical for the acquisition of resistance.**

638 (A) A204 (left) or DasR cells (right) were serum starved for 48 hours to induce  
639 ciliogenesis. After fixation, cells were stained with antibodies against acetylated tubulin  
640 (green), KIF7 (red) and with DAPI (DNA, blue).

641 **(B)** A204 (left) and DasR cells (right) treated as in **A**, were stained with antibodies for  
642 acetylated tubulin (green), IFT81 (red) and with DAPI (blue). Note that both Kif7 and  
643 IFT81 are present along the cilia and at the cilia tip in control A204 cells (arrows) but are  
644 absent in DasR cells. Quantification of Kif7 **(A)** and IFT81 **(B)** is shown on the right. n =  
645 150. Error bars represent s.d. Kif7 P-values, proximal to distal: <0.02 <0,01, <0.02,  
646 <0.03, <0.03, <0.03, <0.03, <0.03, <0.03, <0.02 **(A)**, IFT81 P-values proximal to distal:  
647 <0.03, <0.02, <0.001, <0.02, <0.04 **(B)**, for an unpaired T test.

648 **(C)** A204 cells (left panel), or DasR (right panels) were stained with acetylated tubulin to  
649 mark cilia (green), EB1 (red) and with DAPI (blue). Note that EB1 is present at the cilia  
650 tip of DasR cells (arrow/inset) but not in parental A204 cells. Quantification of EB1  
651 shown on the right (Fluorescence intensity is presented as a ratio of total cilia  
652 fluorescence intensity). n = 150. Error bars represent s.d. EB1 P-values, proximal to  
653 distal: <0.02, <0.002, <0.03, <0.02, <0.005, <0.006 **(C)** for an unpaired T test. **(C')** EB1  
654 was visually confirmed at the cilia tip of A204 and DasR cells. Chart shows  
655 quantification. n=150. Error bars represent s.d. p<0.006, for an unpaired T test.

656 **(D)** Western blots showing total protein levels of Kif7, IFT81 and EB1 (upper panels,  
657 indicated) and loading controls (lower panels) in A204 and DasR cells.

658 **(E)** Cell viability (Cell titer Glo) of A204 cells grown in normal media (with the addition of  
659 DMSO) or dasatinib (indicated), transfected with either control siRNA or Kif7 siRNA  
660 (indicated). Cell viability was normalized to DMSO control treated cells (n = 4); error  
661 bars represent s.d. p<0.02 (0.125  $\mu$  M), p<0.0001 (0.25  $\mu$  M), p<0.0001 (1  $\mu$  M),  
662 unpaired T test.

663 **(F)** A204 cells were serum starved for 48 hours to induce ciliogenesis, then fixed and  
664 stained with antibodies for acetylated tubulin (green) and Kif7 (Boehlke et al.), and with

665 DAPI (blue). Note that A204 cells transfected with a Kif7 siRNA (siKif7) had increased  
666 cilia length compared to cells treated with a control siRNA (siCONT).

667 **(G)** Quantification of cilia length shown in **F**. Cilia length in A204 cells transfected with  
668 siKif7 was significantly increased compared to siCONT.  $n = 150$ , error bars represent  
669 s.d.  $p < 0.002$ , for an unpaired T test.

670 **(H)** Western blot showing Kif7 expression in A204 cells transfected with control siRNA  
671 or Kif7 siRNA (indicated) for the experiments shown in **E, F, G**.

672 **(I)** Cilia length quantification of DasR cells expressing Kif7. Expression of FLAG-tagged  
673 Kif7 reduced cilia length compared to a non-targeting luciferase (Luc) control plasmid.  $n$   
674 = 90, error bars represent s.d.  $p < 0.0001$ , for an unpaired T test.

675 **(J)** Western blot showing FLAG-Kif7 expression in DasR cells transfected with control  
676 luciferase plasmid or FLAG-Kif7 (indicated).

677 These data are representative of three independent experiments.

678  
679

680

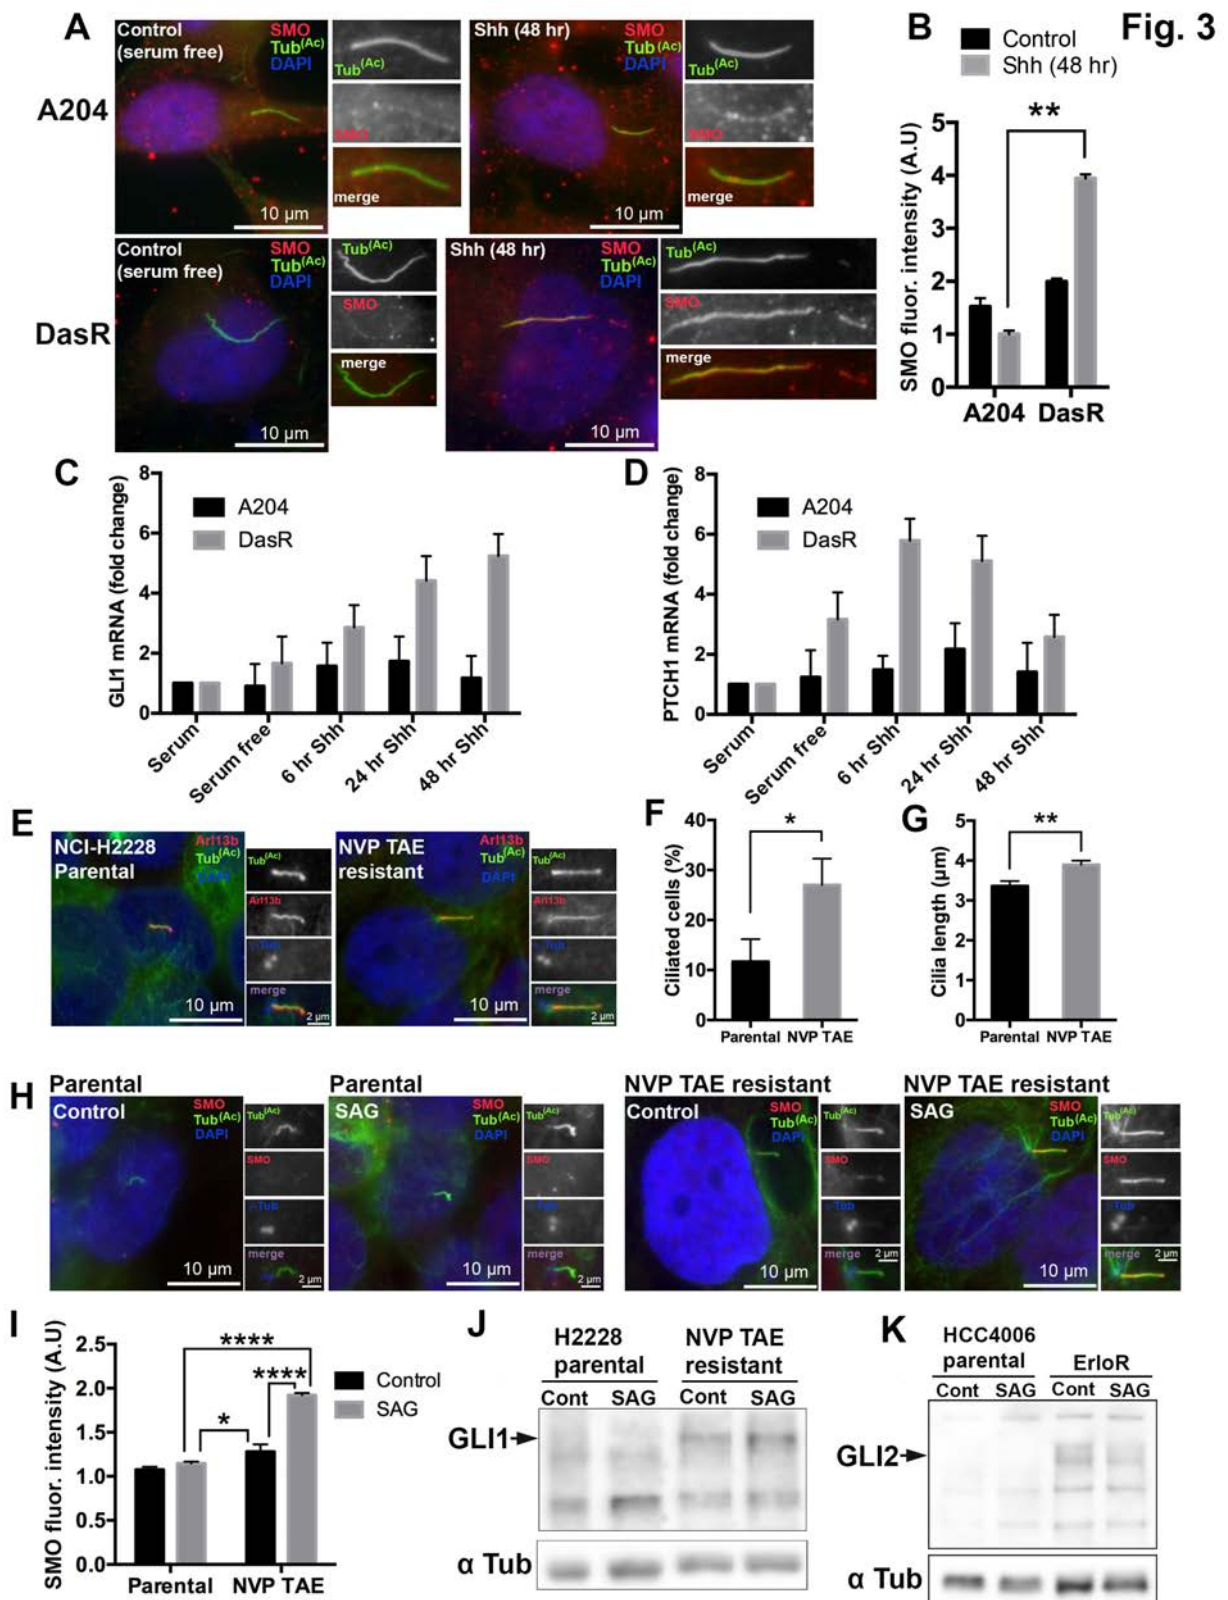

681  
682

683 **Figure 3. Kinase inhibitor resistant cells show increased Hedgehog pathway**  
684 **activation.**

685 **(A)** A204 cells (top panels), or a dasatinib resistant subline (DasR) (lower panels) were  
686 serum starved for 24 hours, then either left in serum-free media (left) or treated with  
687 human sonic hedgehog (Shh, 5  $\mu$  g/ml) (right) for an additional 48 hours. Cells were  
688 then fixed and stained for acetylated tubulin to mark cilia (green), smoothed (SMO,  
689 red) and with DAPI (blue). DasR cells show increased SMO localization to cilia  
690 compared to control A204 cells.

691 **(B)** Quantification of SMO cilia fluorescence intensities for the experiment shown in **A**.  
692 Fluorescence intensity was normalized to surrounding fluorescence. n = 150, error bars  
693 represent s.d. p<0.01, for an unpaired T test. This is representative of three  
694 independent experiments.

695 **(C, D)** Quantitative polymerase chain reaction (qPCR) showing mRNA levels of Hh  
696 target genes of *GLI1* (**C**) and *PTCH1* (**D**) in A204 and DasR cells before serum  
697 starvation, after 24hr of serum starvation and after stimulation with 5  $\mu$  g/ml Shh for the  
698 times indicated. TATA box-binding protein (*TBP*) was used as a reference gene and  
699 fold change was calculated by comparing mRNA levels relative to control (serum).

700 **(E)** Parental (left panels) or NVP TAE resistant (right panels) NCI-H2228 lung-  
701 adenocarcinoma cells were serum starved for 48 hours to induce ciliogenesis, then  
702 fixed and stained with antibodies for acetylated tubulin (green) and Arl13B (red) to mark  
703 cilia,  $\gamma$ -tubulin (blue/inset) for centrioles and 4, 6-diamidino-2-phenylindole (DAPI)  
704 (blue) to mark DNA. Note that primary cilia were shorter in parental cells but longer in  
705 the NVP TAE-resistant subline.

706 **(F, G)** Quantification of ciliated cells (**F**) and cilia length (**G**) shown in **E**. n = 300 for **F**  
707 and n = 150 for **G**. Error bars represent s.d. p<0.02 (**F**) and p<0.005 (**G**), for an  
708 unpaired T test.

709 (H) NCI-H2228 parental or a NVP TAE resistant subline were serum starved for 24  
710 hours, then either left in serum-free media or treated with human SAG (100 nM) for an  
711 additional 48 hours. Cells were then fixed and stained for acetylated tubulin to mark cilia  
712 (green), smoothed (SMO, red) and with DAPI (blue). NVP TAE resistant cells show  
713 increased SMO localization to cilia compared to parental cells.

714 (I) Quantification of SMO cilia fluorescence intensities for the experiment shown in H.  
715 Fluorescence intensity was normalized to surrounding fluorescence. n = 150, error bars  
716 represent s.d.  $p < 0.0001$  (parental SAG vs NVP TAE SAG),  $p < 0.004$  (parental SAG vs  
717 NVP TAE control) and  $p < 0.0001$  (NVP TAE control vs NVP TAE SAG), for Tukey's  
718 multiple comparison test.

719 (J) Western blot showing Gli1 expression in H2228 parental cells and the NVP TAE  
720 resistant subline. Cells were serum starved for 24 hours, then either left in serum-free  
721 media or treated with human SAG (100 nM) for an additional 48 hours. Note the  
722 increased expression of Gli1 in NVP TAE resistant cells compared to parental cells.

723 (K) Western blot showing Gli2 expression in HCC4006 parental cells and the ErloR  
724 resistant subline. Cells were serum starved for 24 hours, then either left in serum-free  
725 media or treated with human SAG (100 nM) for an additional 48 hours. Note the  
726 increased expression of Gli2 in ErloR resistant cells compared to parental cells.

727 Data shown are means  $\pm$  SD, n = 3 independent experiments.

728

729

730

731

732

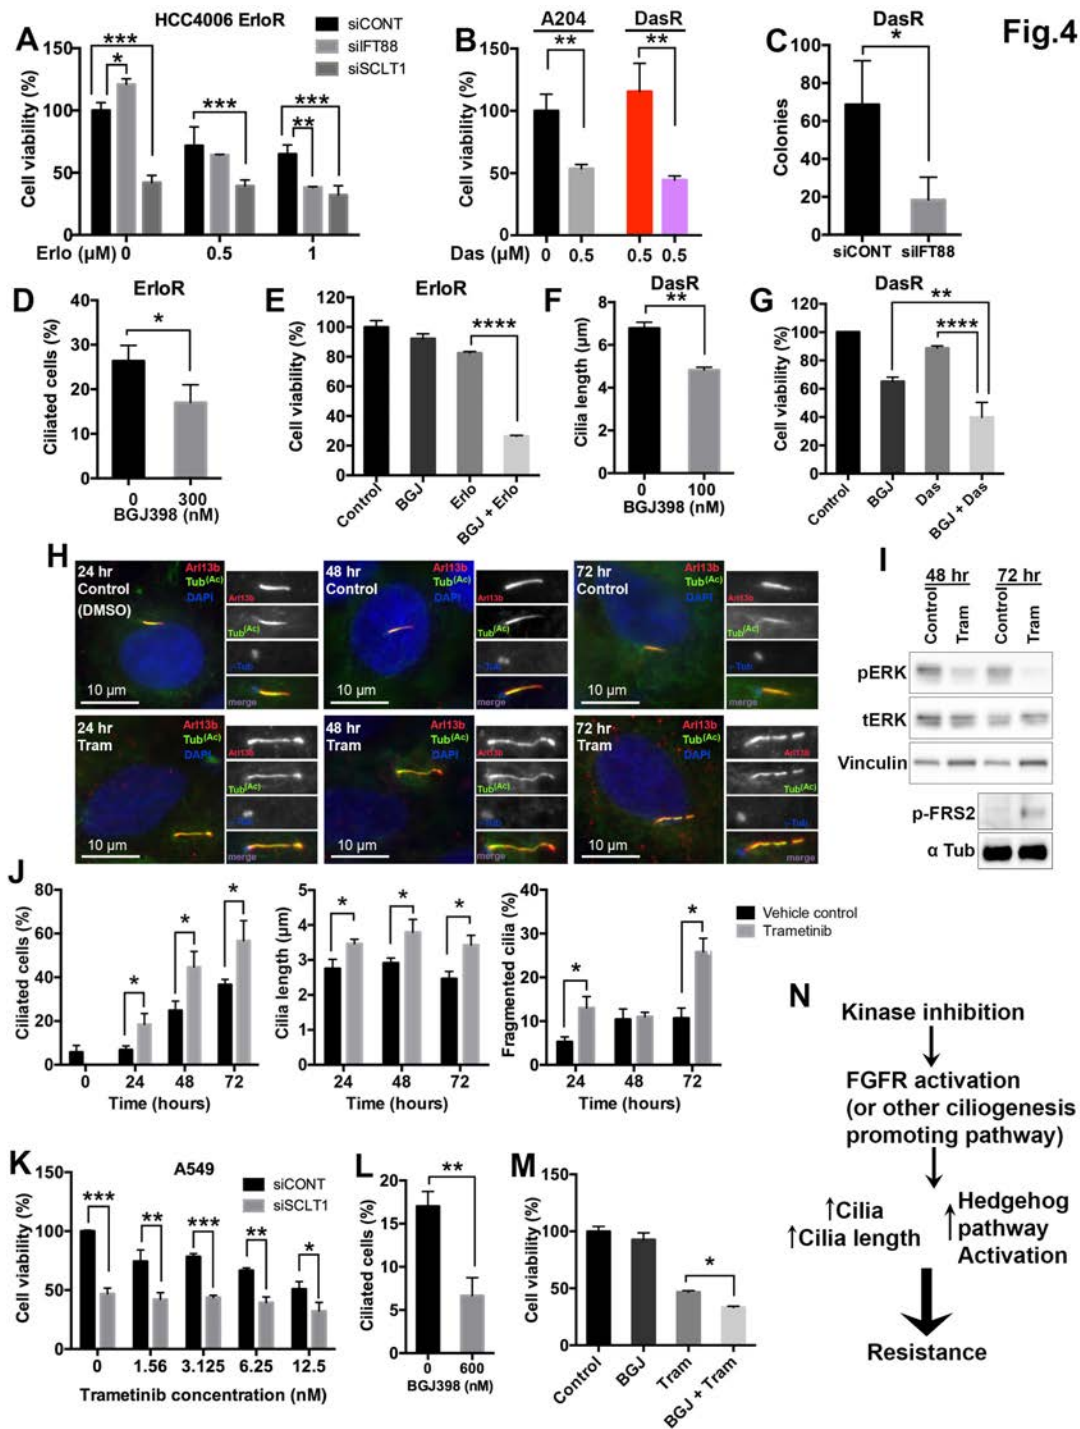

733

734 **Figure 4. Ciliary pathways are key during the onset of kinase inhibitor resistance.**

735 (A) Cell viability (Cell titer Glo) in HCC4006 cells grown in erlotinib (indicated), were  
 736 transfected with either control siRNA, IFT88 siRNA, or SCLT1 siRNA (indicated). Cell  
 737 viability was normalized to siCONT DMSO control (0  $\mu$ M) treated cells (n = 3); error bars  
 738 represent s.d.  $p < 0.05$  (siControl compared to siIFT88 at 0  $\mu$ M),  $p < 0.0001$  (siControl vs



739 siSCLT1 at 0  $\mu$  M),  $p < 0.0008$  (siControl vs siSCLT1 at 0.5  $\mu$  M),  $p < 0.006$  (siControl  
740 compared to siIFT88 at 1  $\mu$  M),  $p < 0.0007$  (siControl compared to siSCLT1 at 1  $\mu$  M),  
741 Tukey's multiple comparison test.

742 **(B)** Cell viability in A204 cells, grown in the absence or the presence of dasatinib  
743 (indicated), and in DasR cells, after transfection with control siRNA or IFT88 siRNA  
744 (Robert et al., 2007). Cell viability is normalized to A204 DMSO control (0  $\mu$ M) ( $n = 3$ ).  
745 Error bars represent s.d.  $p < 0.005$  for A204 grown in 0 dasatinib compared to 0.5  $\mu$  M  
746 dasatinib and  $p < 0.006$  for DasR siCONT compared to siIFT88, unpaired T test.

747 **(C)** Soft agar colony formation in DasR cells transfected with control (non-targeting)  
748 siRNA or siRNA for IFT88 (Robert et al., 2007). Error bar bars represent s.d.  $p < 0.03$ ,  
749 unpaired T test,  $n = 3$ .

750 **(D)** Cilia length of HCC40006 erlotinib resistant cells (Erlor) treated with or without the  
751 FGFR inhibitor BGJ398 for 72 hours. Note that after treatment with BGJ398 cilia length  
752 was reduced.  $n = 150$ , error bars represent s.d.  $p < 0.04$ , unpaired T test.

753 **(E)** Cell viability (Cell titer Glo) of Erlor grown in 1  $\mu$ M erlotinib (Erlor) and 300 nM  
754 BGJ398. Note that combining both erlotinib and BGJ398 significantly reduced growth  
755 compared to erlotinib used as a single agent. Cell viability was normalized to DMSO  
756 control ( $n=3$ ). Error bars represent s.d.  $p < 0.0001$ , for an unpaired T test.

757 **(F)** Cilia length of A204 dasatinib resistant cells (DasR) treated with or without BGJ398  
758 for 24 hours in reduced serum conditions (5 % FBS). Note that after treatment with  
759 BGJ398 cilia length in DasR cells was reduced.  $n = 150$ , error bars represent s.d.  
760  $p < 0.0005$ , unpaired T test.

761 **(G)** Cell viability (Cell titer Glo) of DasR cells treated with dasatinib (0.5  $\mu$ M), the FGFR1  
762 inhibitor BGJ398 (100 nM), or a combination of both.  $n = 3$ , cell viability is normalized to

763 the DMSO control. Error bars represent s.d.  $p < 0.004$  (BGJ vs BGJ + Das),  $p < 0.0001$   
764 (Das vs BGJ + Das), Tukey's multiple comparison test.

765 **(H)** A549 cells were treated with 50 nmol/L Trametinib (Tram) or DMSO (vehicle control)  
766 for the indicated times then fixed and stained with antibodies for acetylated tubulin  
767 (green), Arl13B (red),  $\gamma$ -tubulin (blue/inset) and DAPI (blue). Note that exposure to  
768 trametinib promoted a significant increase in cilia, cilia length and fragmentation.

769 **(I)** Western blot showing A549 expression of phosphorylated ERK, total ERK, vinculin  
770 (loading control), phospho-FRS2 and  $\alpha$ -tubulin (loading control) in the presence and  
771 absence of 50 nM trametinib (Tram). Note that after 48 and 72 hours of trametinib  
772 exposure pERK was reduced. Phospho-FRS2 expression increased after 72 hours.

773 **(J)** Quantification of ciliated cells, cilia length and fragmentation shown in **H**.  $n = 150$   
774 cilia, error bars represent the s.d.  $p < 0.05$  unpaired T test.

775 **(K)** Cell viability in A549 cells after treatment with the MEK inhibitor trametinib in control  
776 cells (siCONT) or upon down-regulation of the distal appendage protein SCLT1  
777 (siSCLT1). Cell viability was normalized to siCONT DMSO control (0 nM) cells.  $n = 3$ ,  
778  $p < 0.0001$  for 0 nM,  $p < 0.008$  for 1.56 nM,  $p < 0.0009$  for 6,25 nM and  $p < 0.003$  for 12,5  
779 nM, unpaired T test.

780 **(L)** Cilia length of A549 cells treated with or without the FGFR inhibitor BGJ398 for 48  
781 hours. Note that after treatment with BGJ398 cilia length of cells was reduced.  $n = 150$ ,  
782 error bars represent s.d.  $p < 0.003$ , unpaired T test.

783 **(M)** Cell viability (Cell titer Glo) of A549 cells treated with trametinib (6.25 nM), BGJ398  
784 (300 nM), or a combination of both.  $n = 3$ , cell viability is normalized to the DMSO  
785 control. Error bars represent s.d.  $p < 0.02$ , for an unpaired T test.

786 **(N)** Proposed model for up-regulation of ciliogenesis during kinase inhibitor resistance  
787 (KIR) acquisition.

788

789 **Table 1: Cilia and drug resistance.** Summary of cilia changes observed in resistant cell  
 790 lines.

791

| Cell lines/Acquired resistance | Drug resistance | Cilia length | Ciliated cells |
|--------------------------------|-----------------|--------------|----------------|
| A204 DasR1                     | Dasatinib       | ++           | -              |
| A204 DasR2                     | Dasatinib       | ++           | -              |
| H2228                          | NVP-TAE         | ++           | ++             |
| HCC4006                        | Erlotinib       | ++           | ++             |
| PC9 Afatinib                   | Afatinib        | -            | -              |
| PC9 Erlotinib                  | Erlotinib       | -            | -              |

  

| Cell lines/ <i>de novo</i> resistance | Drug resistance | Cilia length | Ciliated cells |
|---------------------------------------|-----------------|--------------|----------------|
| A549                                  | Trametinib      | ++           | ++             |
| H23                                   | Trametinib      | ++           | ++             |
| H1792                                 | Trametinib      | -            | ++             |

  

| Cell lines/Chemical resistance (acquired) | Drug resistance | Cilia length | Ciliated cells |
|-------------------------------------------|-----------------|--------------|----------------|
| A549                                      | Cisplatin       | -            | ++             |
| A549                                      | Carboplatin     | -            | -              |
| A549                                      | Vinflunine      | ++           | ++             |

792

793

794

Supplementary fig 1.

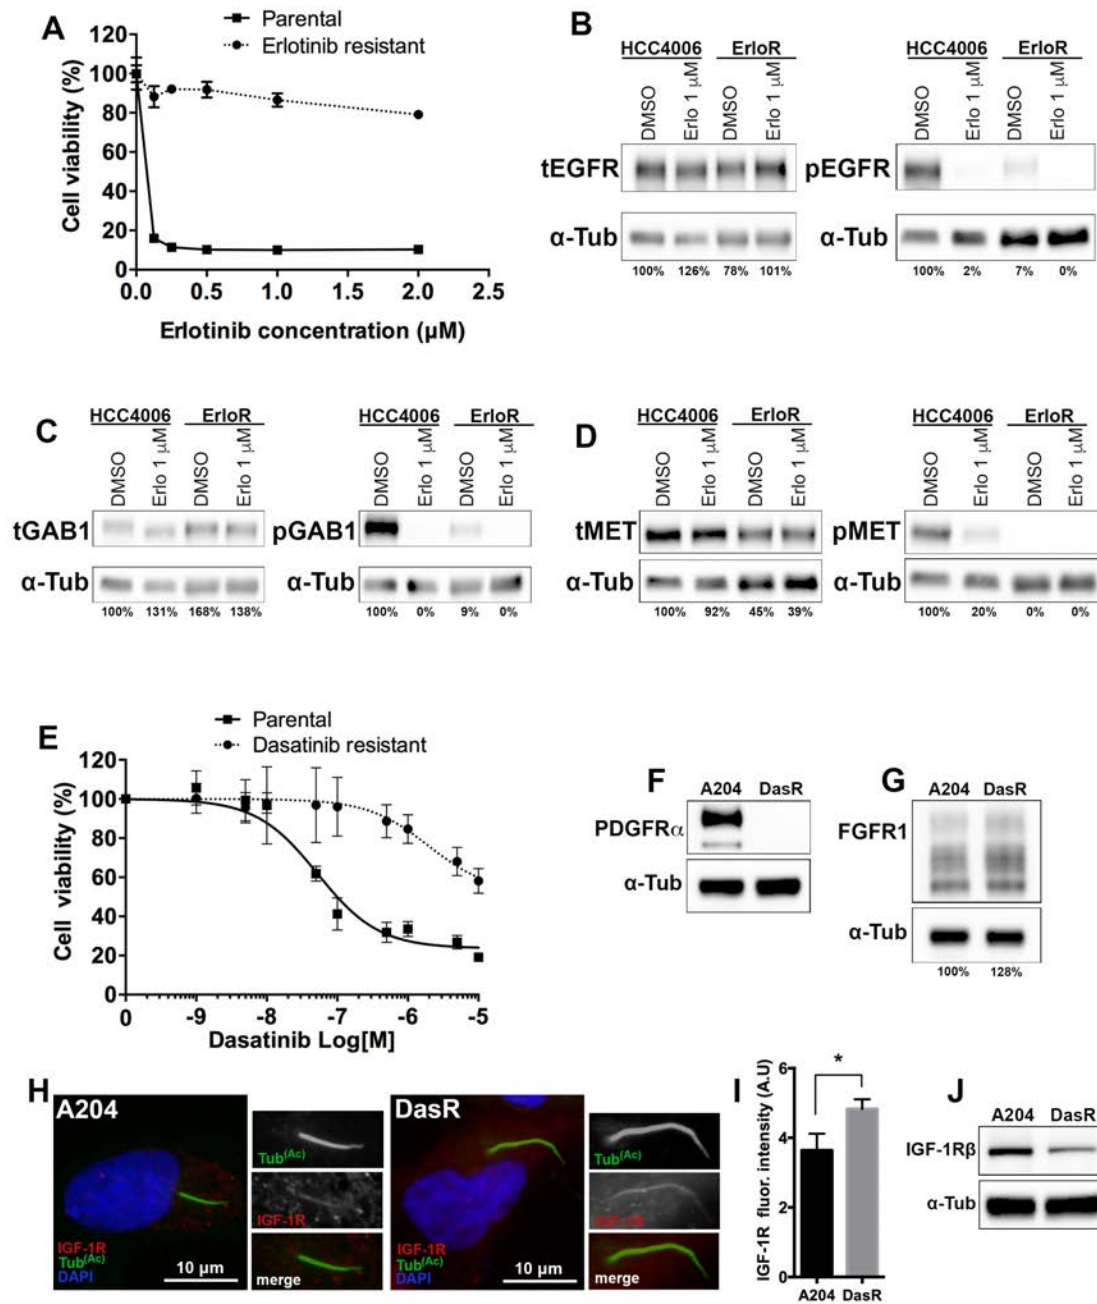

795

796 **Supplementary figure 1. Molecular characterization of parental and kinase inhibitor**

797 **resistant counterparts.**

798 **(A)** Dose response for erlotinib resistant cells. HCC4006 and the erlotinib resistant

799 subline were treated with a range of concentrations of erlotinib to determine growth

800 response curves. Cell viability was normalized to DMSO control (n=3).

801 **(B, C, D)** Western blots showing HCC4006 parental and erlotinib resistant subline  
802 (Erlor) expression of total and phosphorylated: EGFR **(B)**, GAB1 **(C)** and MET **(D)**.  $\alpha$ -  
803 tubulin (indicated) was used as a loading control. Cells were treated with or without  
804 erlotinib (1  $\mu$ M) for 6 hours.

805 **(E)** Dose response for dasatinib resistant cells. A204 and the dasatinib resistant subline  
806 (DasR) were treated with a range of dasatinib concentrations to determine growth  
807 response. Cell viability was normalized to DMSO control (n=3).

808 **(F, G)** Western blots showing PDGFR $\alpha$  **(F)** and FGFR1 **(G)** of A204 and DasR cells  
809 (indicated). Note that DasR cells have no PDGFR $\alpha$  expression and a slight increase in  
810 FGFR1 expression.

811 **(H)** DasR cells show increased ciliary localization of IGF-1R $\beta$  compared to control cells.  
812 A204 (left) or DasR cells (right) were serum starved for 48 hours to induce ciliogenesis.  
813 After fixation, cells were stained with acetylated tubulin (green), IGF-1R $\beta$  (red) and  
814 DAPI (DNA).

815 **(I)** Quantification of IGF-1R $\beta$  cilia fluorescence intensities shown in **H**. Fluorescence  
816 intensities were normalized to background camera fluorescence intensity. n = 150 cilia,  
817 error bars represent s.d. p<0.03, unpaired T test.

818 **(J)** Western blot showing total expression levels of IGF-1R $\beta$  (upper panel, indicated)  
819 and loading controls (lower panel) in A204 and DasR cells.

820

821

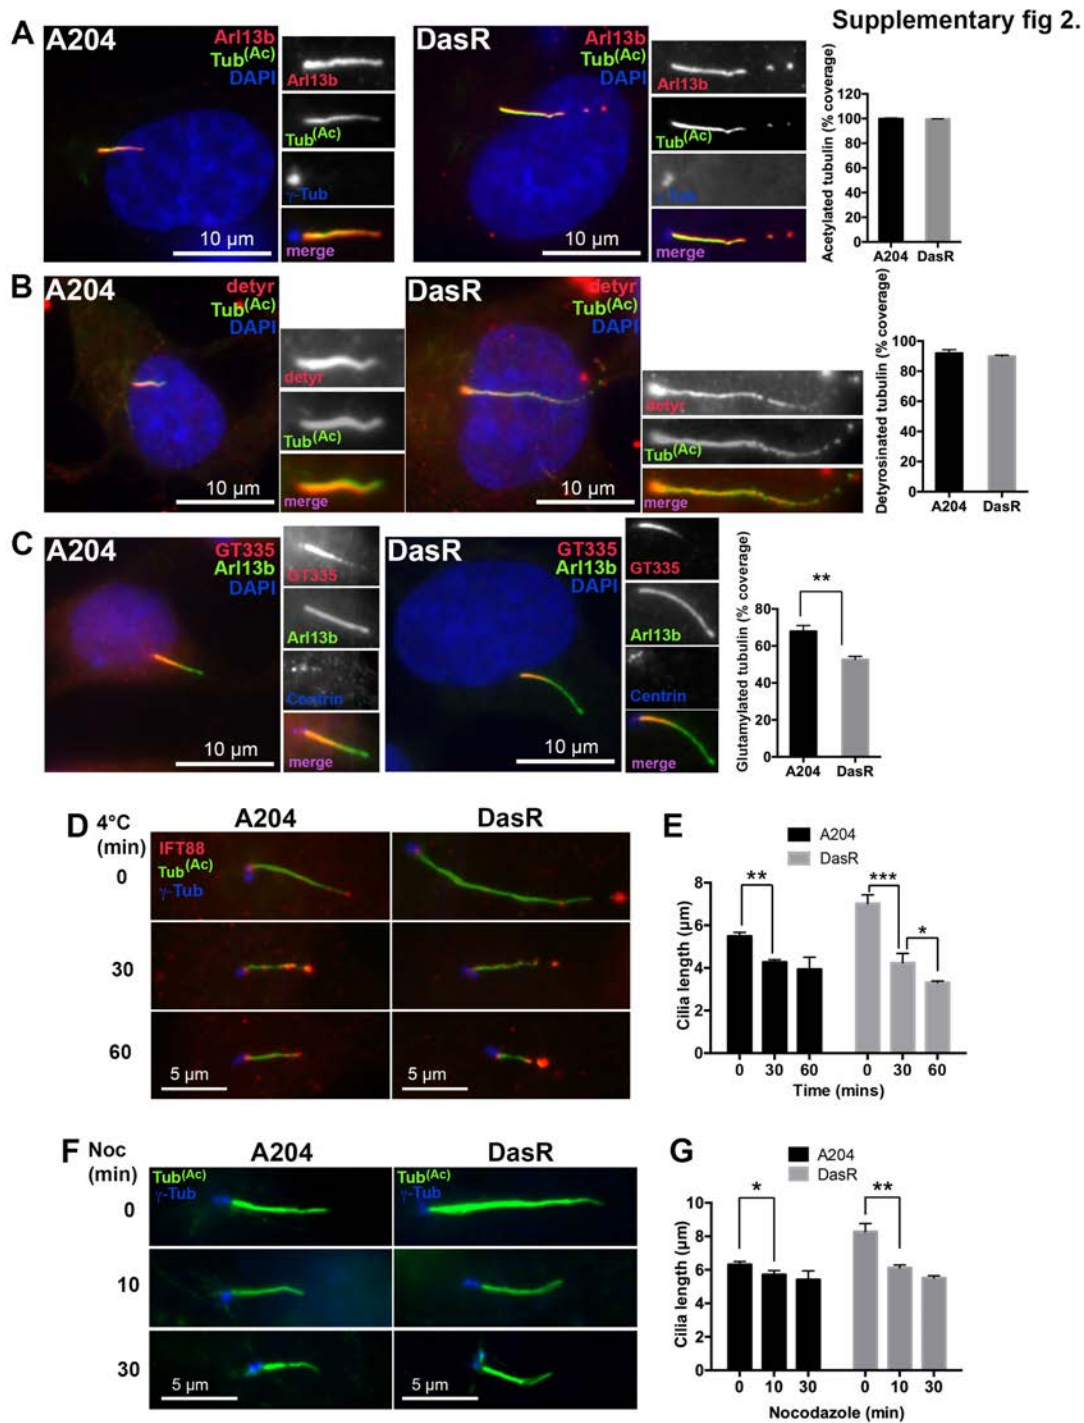

822

823

824 **Supplementary figure 2. Kinase inhibitor resistant cells show decreased tubulin**  
 825 **glutamylated along the axoneme and increased cilia instability**

826 (A, B, C) Control (left panels) or dasatinib resistant cells (right panels) were serum

827 starved for 48 hours to induce cilia formation, then fixed and stained with antibodies for

828 Arl13b to mark the ciliary membrane (red), together with antibodies for different post-  
829 translational modifications (shown in green) including acetylated tubulin (**A**)  
830 deetyrosinated tubulin (**B**) and glutamylated tubulin (GT335) (**C**). Centrioles are marked  
831 in blue (insets) with  $\gamma$ -tubulin or centrin (indicated) and DAPI is shown in blue. Graphs  
832 on the right show a quantitative analysis of the results for **A**, **B** and **C**, expressed as a  
833 function of total cilia length. n = 150, error bars represent s.d. p<0.01 unpaired T test.  
834 Note that DasR cilia show less polyglutamylated tubulin (GT335) along the axoneme  
835 compared to parental A204 cells.

836 (**D**) Time course of cilia retraction in response to cold treatment (4°C) in A204 and DasR  
837 cells (indicated). Acetylated tubulin is shown in green, IFT88 in red and  $\gamma$ -tubulin in blue.  
838 (**E**) Quantification of cilia length in response to cold treatment for the experiment shown  
839 in **D**. Cilium length was measured using acetylated tubulin, n = 150. Error bars  
840 represent the s.d. p<0.003 between A204 at 0 and 30 mins, p<0.0001 between DasR at  
841 0 and 30 mins and p <0.02 between DasR at 30 and 60 mins, Tukey's multiple  
842 comparison test.

843 (**F**) Time course of cilia retraction in response to nocodazole (10  $\mu$  M) in A204 (left) and  
844 DasR cells (right). Acetylated tubulin staining marks primary cilia (green) and  $\gamma$ -tubulin  
845 marks centrioles (blue).

846 (**G**) Cilium length was measured using acetylated tubulin staining from the time course  
847 shown in **F**. n = 150 cilia, error bars represent the s.d. p<0.02 for A204 0 and 30 mins  
848 and p<0.0001 DasR 0 and 30 mins, Tukey's multiple comparison test. Note that DasR  
849 cells have an increased rate of cilia shortening in response to nocodazole.

850

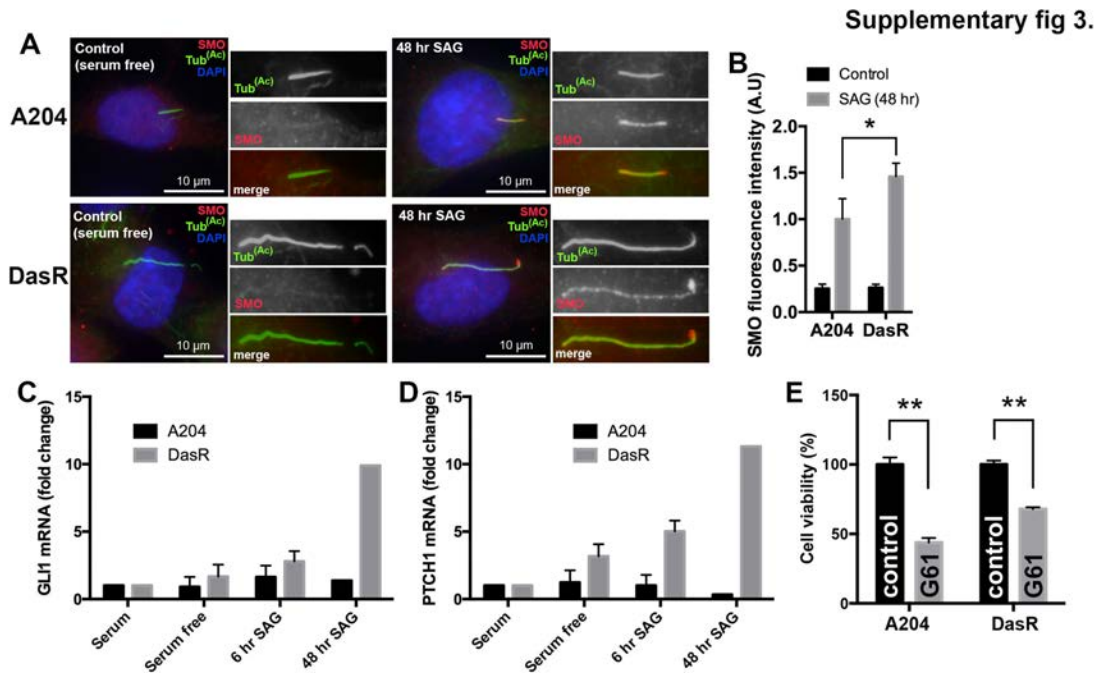

851

852 **Supplementary figure 3. Upon SAG activation dasatinib resistant cells recruit**

853 **more SMO into the cilium and activate the Hh pathway stronger and more**

854 **prolonged compared to non-resistant control cells.**

855 **(A)** A204 cells (top panel), or a dasatinib resistant (DasR) subline (lower panel) were  
 856 serum starved for 24 hours and either left in serum-free media for an additional 48  
 857 hours (left) or treated with SAG (100 nM) for the same amount of time (right). Cells were  
 858 then fixed and stained with antibodies for acetylated tubulin to mark cilia (green), SMO  
 859 (red) and with DAPI (blue) to mark DNA.

860 **(B)** Quantification of SMO cilia fluorescence intensities for the experiment shown in **A**.

861 Note the increased SMO fluorescence intensity in DasR compared to A204.

862 Fluorescence intensity was normalized to surrounding fluorescence, n = 150, error bars  
 863 represent s.d. p<0.04, unpaired T test.

864 **(C, D)** Quantitative polymerase chain reaction (qPCR) showing fold change (relative to  
 865 no serum starvation) mRNA levels of GLI1 **(C)** and PTCH1 **(D)** in A204 and DasR cells.

866 Note the fold change of both *GLI1* **(C)** and *PTCH1* **(D)** is increased in DasR cells

867 compared to A204 at all time points. GLI1 and PTCH1 mRNA values are normalized to



868 TATA box-binding protein (*TBP*) mRNA values, fold change calculated by comparing to  
869 mRNA levels prior to serum starvation; n = 3 (0-6h).

870 **(E)** Cell viability of A204 and DasR cells (indicated), in normal media (black columns) or  
871 with the addition Hh pathway inhibitor Gant61 (G61) (2.5  $\mu$  M) (grey columns). Cell  
872 viability was normalized to DMSO control treated cells. p<0.01 unpaired T test.

873

874

875

876

Supplementary fig 4.

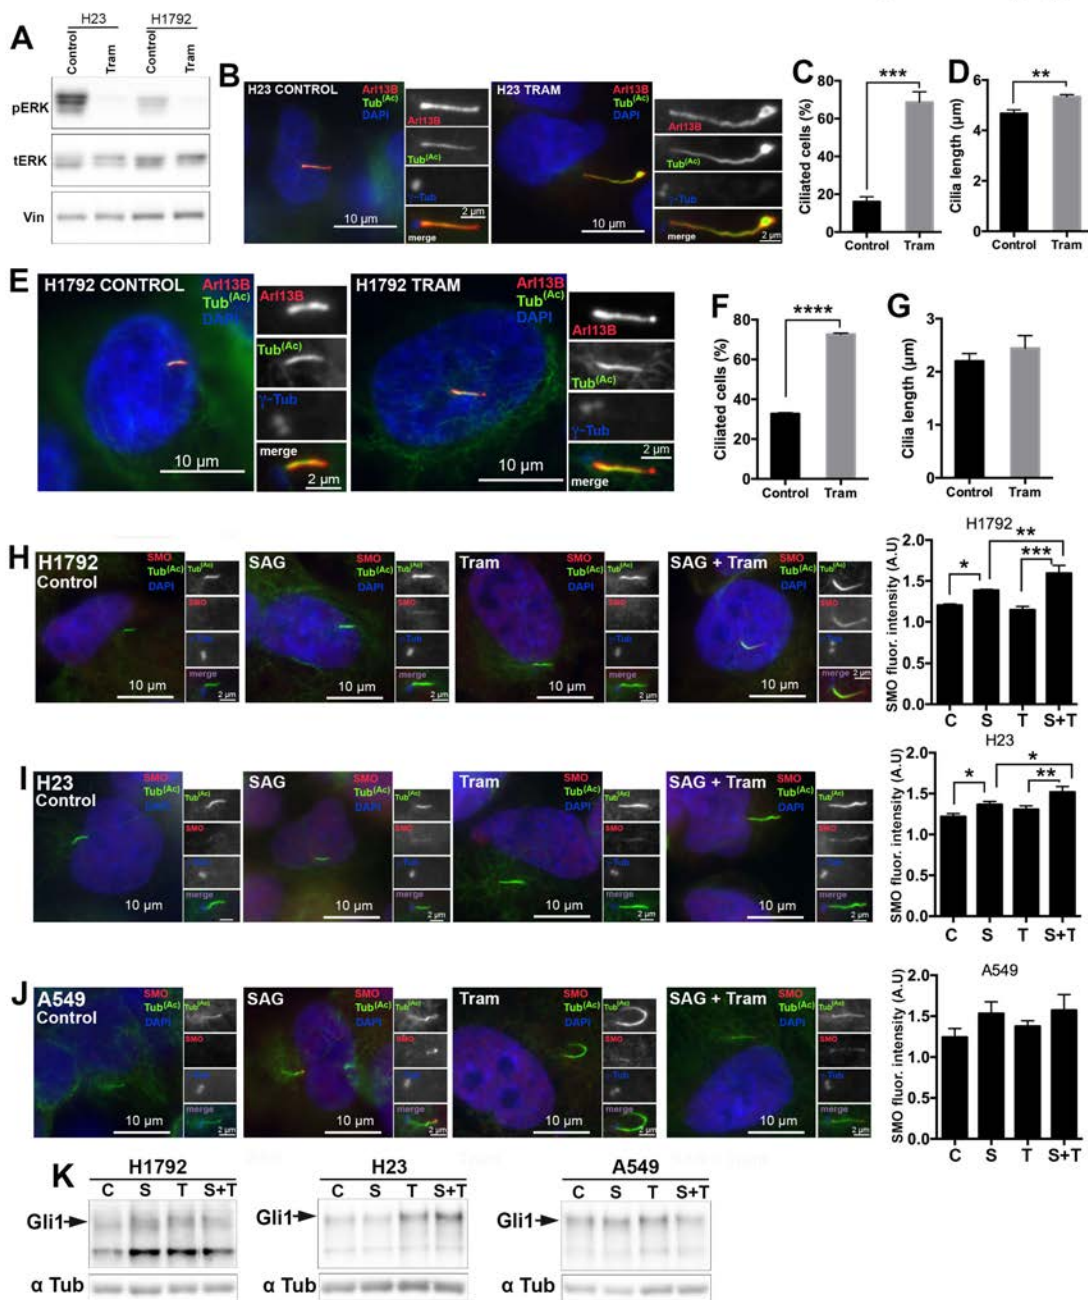

877

878

879 **Supplementary figure 4. De novo drug resistance in patient-derived tumor cell**  
 880 **lines shows increased cilia frequency, cilia length and hedgehog pathway**  
 881 **activation.**

882 (A) Western blots showing NCI-H23 and NCI-H1792 expression of pERK in absence or  
 883 presence of 50 nM trametinib (48 hrs).

884 **(B)** NCI-H23 cells treated with 50 nM Trametinib or DMSO (control) for 48hrs then fixed  
885 and stained with antibodies for acetylated tubulin (green), Arl13B (red),  $\gamma$ -tubulin  
886 (blue/inset) and DAPI (blue). Note that exposure to trametinib promoted an increase in  
887 cilia length.

888 **(C, D)** Quantification of ciliated cells **(C)** and cilia length **(D)** in **B**. n = 300 cells **(C)**, n =  
889 150 cilia **(D)**, error bars represent the s.d.  $p < 0.0001$  **(C)** and  $p < 0.003$  **(D)**, for an  
890 unpaired T test.

891 **(E)** NCI-H1792 cells treated with 50 nM Trametinib or DMSO (control) for 48hrs then  
892 fixed and stained with antibodies for acetylated tubulin (green), Arl13B (red),  $\gamma$ -tubulin  
893 (blue/inset) and DAPI (blue).

894 **(F, G)** Quantification of ciliated cells **(F)** and cilia length **(G)** shown in **E**. n = 300 cells  
895 **(F)**, n = 150 cilia **(G)**, error bars represent the s.d.  $p < 0.0001$  **(F)**, for an unpaired T test.

896 **(H)** NCI-H1792 cells were treated either with DMSO control (C), 100 nM SAG (S), 50  
897 nM trametinib (T) or a combination of SAG and trametinib (S+T) for 48 hours. Cells  
898 were then fixed and stained with antibodies for acetylated tubulin to mark cilia (green),  
899 SMO (red) and with DAPI (blue) to mark DNA. Quantification of SMO cilia fluorescence  
900 intensities is shown on the right. Note the combination of trametinib and SAG increases  
901 SMO cilia fluorescence compared to SAG alone. Fluorescence intensity was normalized  
902 to surrounding fluorescence, n = 150, error bars represent s.d.  $p < 0.02$  (C vs S),  
903  $p < 0.0001$  (T vs S+T),  $p < 0.007$  (S vs S+T), Tukey's multiple comparison test.

904 **(I)** NCI-H23 cells were treated either with DMSO control (C), 100 nM SAG (S), 50 nM  
905 trametinib (T) or a combination of SAG and trametinib (S+T) for 48 hours. Cells were  
906 then fixed and stained with antibodies for acetylated tubulin to mark cilia (green), SMO  
907 (red) and with DAPI (blue) to mark DNA. Quantification of SMO cilia fluorescence  
908 intensities is shown on the right. Note the combination of trametinib and SAG increases

909 SMO cilia fluorescence compared to SAG alone. Fluorescence intensity was normalized  
910 to surrounding fluorescence, n = 150, error bars represent s.d.  $p < 0.03$  (C vs S),  
911  $p < 0.004$  (T vs S+T),  $p < 0.03$  (S vs S+T), Tukey's multiple comparison test.

912 **(J)** A549 cells were treated either with DMSO control (C), 100 nM SAG (S), 50 nM  
913 trametinib (T) or a combination of SAG and trametinib (S+T) for 48 hours. Cells were  
914 then fixed and stained with antibodies for acetylated tubulin to mark cilia (green), SMO  
915 (red) and with DAPI (blue) to mark DNA. Quantification of SMO cilia fluorescence  
916 intensities is shown on the right. Fluorescence intensity was normalized to surrounding  
917 fluorescence, n = 150, error bars represent s.d.

918 **(K)** Western blots showing GLI1 expression for H1792, H23 and A549 cells after 48hrs  
919 of DMSO (control) (C), SAG (S), Trametinib (T) or SAG and Trametinib (S+T) exposure.  
920  
921  
922

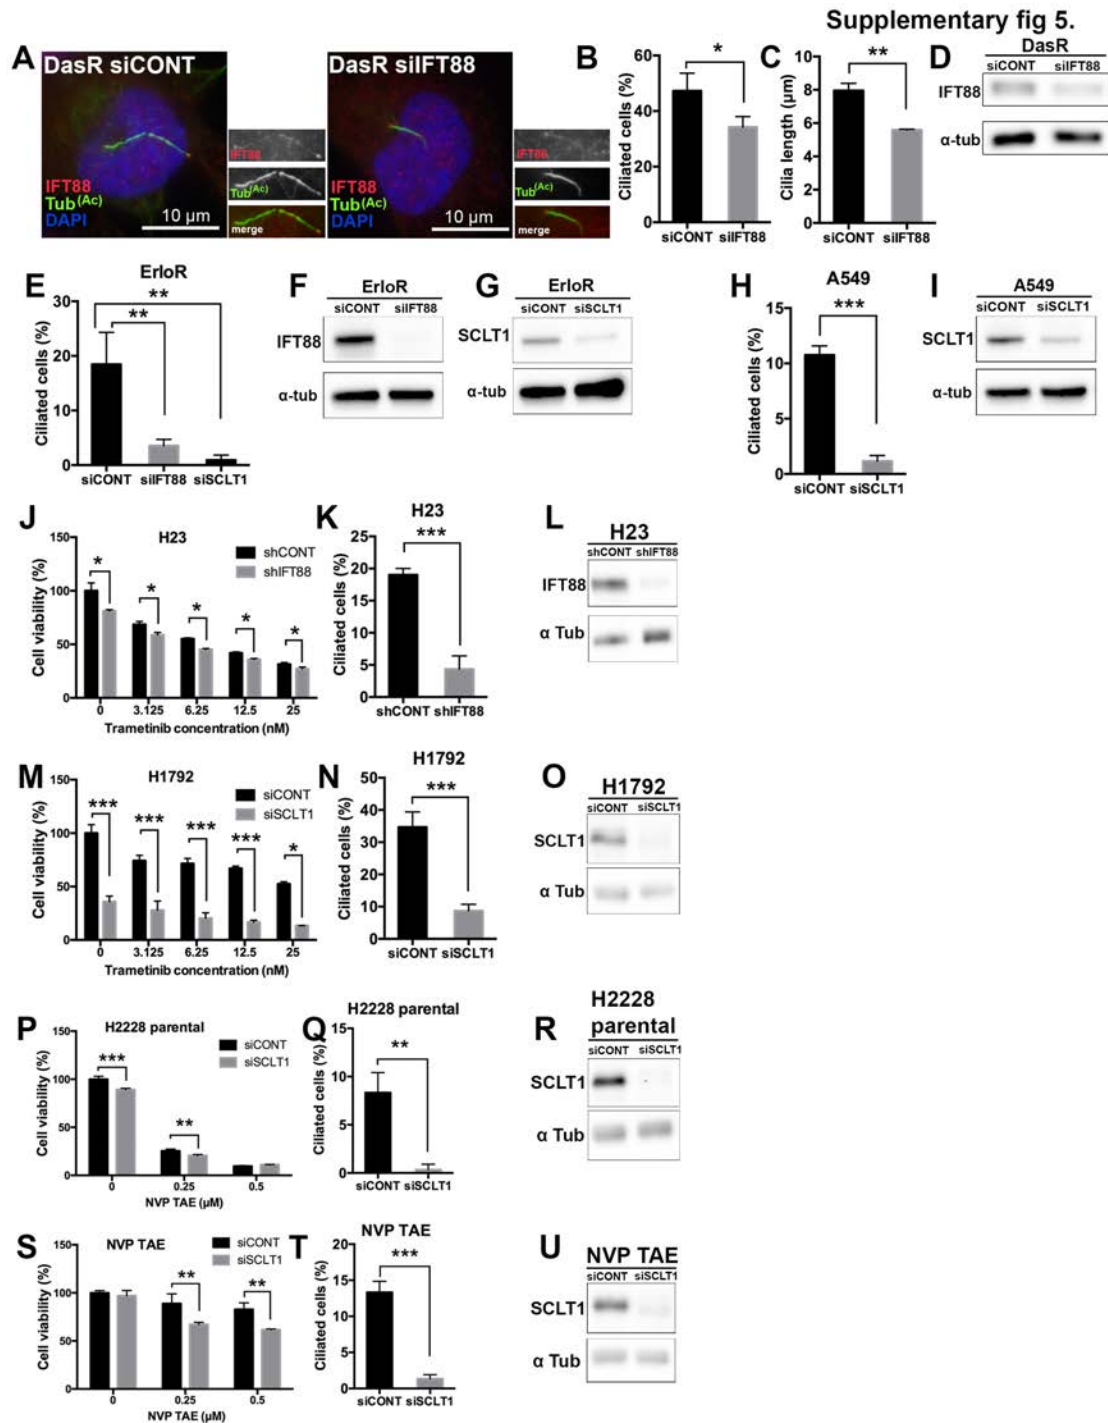

923

924 **Supplementary figure 5. IFT88 and SCLT1 downregulation disrupt ciliogenesis in**  
 925 **kinase inhibitor resistant cells.**

926 **(A)** DasR cells transfected with an IFT88 siRNA (siIFT88) (Robert et al., 2007) had  
 927 reduced ciliated cells and cilia length compared to cells treated with a control siRNA  
 928 (siCONT). DasR cells were serum starved for 48 hours to induce ciliogenesis, then fixed

929 and stained with antibodies for acetylated tubulin (green), IFT88 (red) to mark cilia, and  
930 with DAPI (blue).

931 **(B, C)** Quantification of percent ciliated cells (n=300), and cilia length (n=150) for the  
932 experiment shown in **A**. Error bars represent s.d.  $p < 0.04$  (for **B**),  $p < 0.0008$  (for **C**)  
933 unpaired T test.

934 **(D)** Western blot showing IFT88 expression in DasR cells transfected with control  
935 siRNA or IFT88 siRNA (indicated) for the experiment in **A, B, C**.

936 **(E)** Cilia quantification in HCC4006-Erlotinib resistant subline (Erlor) transfected with  
937 either control siRNA, siRNA for IFT88 (siIFT88) (Smartpool) or SCLT1 siRNA (siSCLT1)  
938 (Smartpool). Note that in both cases cilia frequency is significantly decreased compared  
939 to control siRNA. n = 300, error bars represent s.d.  $p < 0.003$  (siCONT vs siIFT88) and  
940  $p < 0.005$  (siCONT vs siSCLT1).

941 **(F, G)** Western blots showing IFT88 (**F**) or SCLT1 (**G**) expression of Erlor cells,  
942 transfected with control siRNA and either IFT88 siRNA (**F**) or SCLT1 siRNA (**G**) for the  
943 quantification shown in **E**.

944 **(H)** A549 cells transfected with siRNA for SCLT1 (siSCLT1) had reduced ciliated cells  
945 compared to an siRNA control (siCONT). n = 300, error bars represent s.d.  $p < 0.0001$ .

946 **(I)** Western blot showing SCLT1 expression in A549 cells transfected with control siRNA  
947 or SCLT1 siRNA (indicated) for the experiment shown in **H**.

948 **(J)** Cell viability in H23 cells after treatment with the MEK inhibitor trametinib in control  
949 cells (shCONT) or upon down-regulation of IFT88 with an inducible IFT88 shRNA  
950 (shIFT88). Cell viability was normalized to shCONT (DMSO). n = 4,  $p < 0.003$  for 0 nM,  
951  $p < 0.0001$  for 1.56 nM,  $p < 0.002$  for 3.125 nM,  $p < 0.0001$  for 6,25 nM,  $p < 0.0001$  for 12.5  
952 nM and  $p < 0.001$  for 25 nM, unpaired T test.

953 **(K)** Quantification of percent ciliated cells (n=300) for the experiment shown in **J**. Error  
954 bars represent s.d.  $p < 0.0005$ , unpaired T test.

955 **(L)** Western blot showing IFT88 expression in H23 cells infected with shCONT or  
956 shIFT88 (indicated) for the experiment shown in **J**.

957 **(M)** Cell viability in H1792 cells after treatment with the MEK inhibitor trametinib in  
958 control cells (siCONT) or upon down-regulation of SCLT1 (siSCLT1). Cell viability was  
959 normalized to siCONT (DMSO),  $p < 0.0004$  for 0 nM,  $p < 0.002$  for 3.125 nM,  $p < 0.0003$  for  
960 6,25 nM,  $p < 0.0001$  for 12.5 nM and  $p < 0.0001$  for 25 nM, unpaired T test.

961 **(N)** Quantification of percent ciliated cells (n=300) for the experiment shown in **M**. Error  
962 bars represent s.d.  $p < 0.002$ , unpaired T test.

963 **(O)** Western blot showing SCLT1 expression in H1792 cells transfected with siCONT or  
964 siSCLT1 (indicated) for the experiment shown in **M**.

965 **(P)** Cell viability in H2228 parental cells after treatment with NVP TAE in control cells  
966 (siCONT) or upon down-regulation of SCLT1 (siSCLT1). Cell viability was normalized to  
967 siCONT (DMSO),  $n = 3$ ,  $p < 0.0001$  for 0  $\mu\text{M}$ , and  $p < 0.004$  for 0.25  $\mu\text{M}$ , unpaired T test.

968 **(Q)** Quantification of percent ciliated cells (n=300) for the experiment shown in **P**. Error  
969 bars represent s.d.  $p < 0.004$ , unpaired T test.

970 **(R)** Western blot showing SCLT1 expression in H2228 cells transfected with siCONT or  
971 siSCLT1 (indicated) for the experiment shown in **P**.

972 **(S)** Cell viability in H2228 NVP TAE resistant cells after treatment with NVP TAE in  
973 control cells (siCONT) or upon down-regulation of SCLT1 (siSCLT1). Cell viability was  
974 normalized to siCONT (DMSO).  $n = 3$ ,  $p < 0.0006$  for 0.25  $\mu\text{M}$ , and  $p < 0.006$  for 0.5  $\mu\text{M}$ ,  
975 unpaired T test. Note that in the absence of cilia, NVP-TAE resistant cells become more  
976 sensitive to the inhibitor.

977 (T) Quantification of percent ciliated cells (n=300) for the experiment shown in S. Error  
 978 bars represent s.d.  $p < 0.0003$ , unpaired T test.

979 (U) Western blot showing SCLT1 expression in H2228 cells transfected with siCONT or  
 980 siSCLT1 (indicated) for the experiment shown in S.

981

Supplementary fig 6.

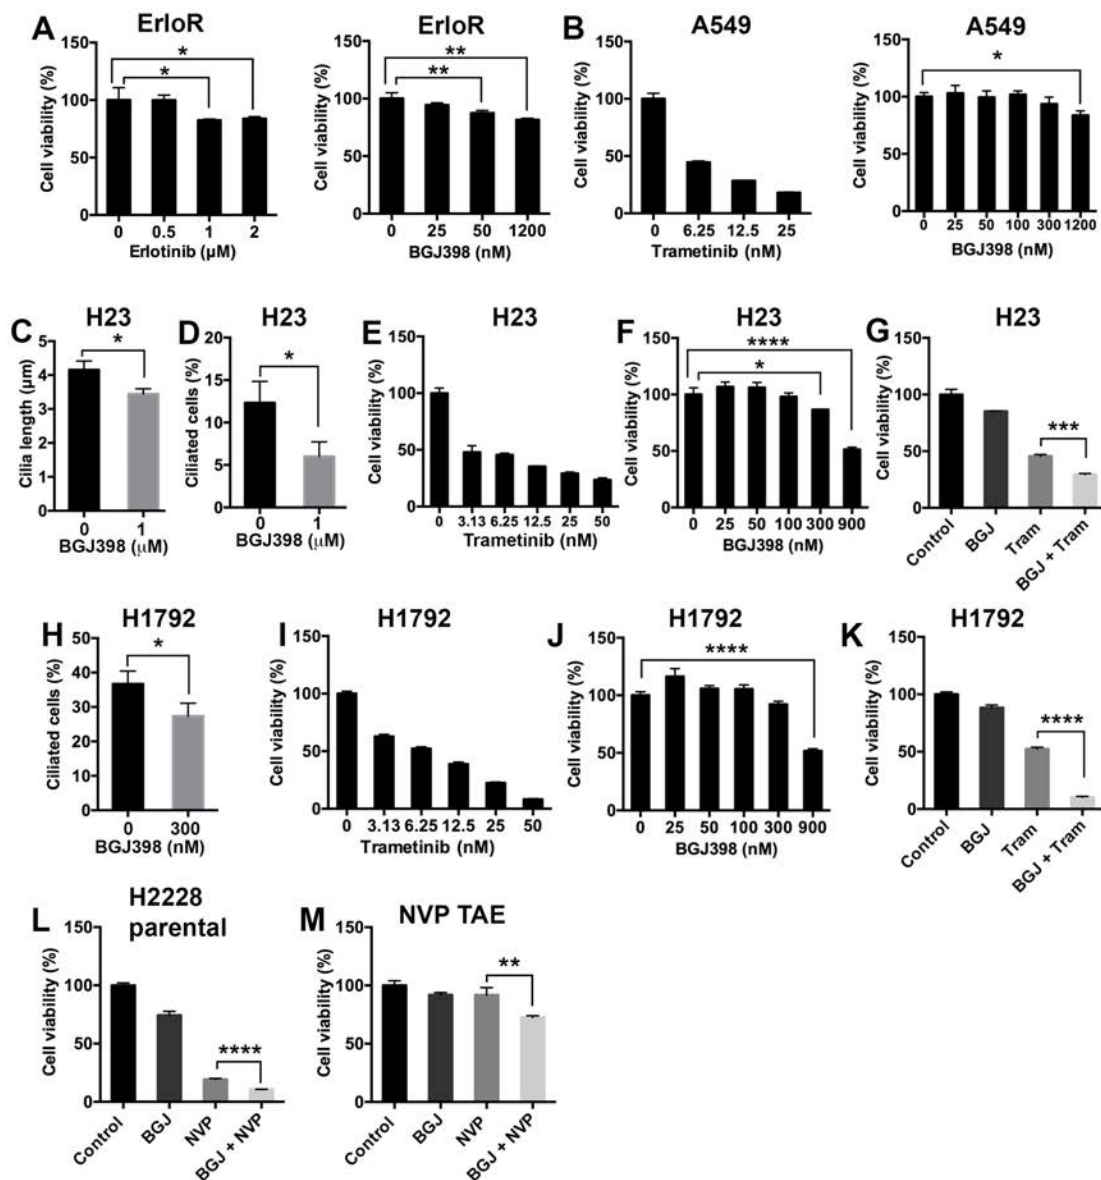

982

983

984 **Supplementary figure 6. Targeting FGFR sensitises cells to kinase inhibitors.**



985 **(A)** Cell viability (Cell titer Glo) of the HCC4006 erlotinib resistant subline (ErloR) grown  
986 in a range of erlotinib (left graph) and the FGFR inhibitor BGJ398 (right graph)  
987 concentrations. Cell viability was normalized to DMSO control (n=3). Error bars  
988 represent s.d.  $p < 0.03$  (0 compared to 1  $\mu\text{M}$ , erlotinib),  $p < 0.05$  (0 compared to 2  $\mu\text{M}$   
989 erlotinib),  $p < 0.0001$  (0 compared to 50 nM, BGJ398),  $p < 0.05$  (0 compared to 1200 nM  
990 BGJ398), Tukey's multiple comparison test. The double treatment for this cell line is  
991 shown in Figure 4E.

992 **(B)** Cell viability (Cell titer Glo) of A549 cells grown in a range of trametinib (left graph)  
993 and BGJ398 (right graph) concentrations. Cell viability was normalized to DMSO control  
994 (n=3). Error bars represent s.d.  $p < 0.02$  (0 compared to 1200 nM BGJ398), Tukey's  
995 multiple comparison test. The double treatment for this cell line is shown in Figure 4M.

996 **(C)** Cilia length quantification of H23 cells treated with or without the FGFR inhibitor  
997 BGJ398 for 48 hours. Note that after treatment with BGJ398 cilia length was reduced. n  
998 = 150, error bars represent s.d.  $p < 0.02$ , unpaired T test.

999 **(D)** Cilia percentage quantification of H23 cells when treated with or without the FGFR  
1000 inhibitor BGJ398 for 48 hours. Note that after treatment with BGJ398 cilia percentage  
1001 was reduced. n = 150, error bars represent s.d.  $p < 0.03$ , unpaired T test.

1002 **(E)** Cell viability (Cell titer Glo) of H23 grown in a range of trametinib concentrations.  
1003 Cell viability was normalized to DMSO control (n=3). Error bars represent s.d.

1004 **(F)** Cell viability (Cell titer Glo) of H23 grown in a range of concentrations of the FGFR  
1005 inhibitor BGJ398. Cell viability was normalized to DMSO control (n=3). Error bars  
1006 represent s.d.  $p < 0.02$  (0 nM vs 300 nM),  $p < 0.0001$  (0 nM vs 900 nM), Tukey's multiple  
1007 comparison test.

1008 **(G)** Cell viability (Cell titer Glo) of H23 cells treated with trametinib (6.25 nM), BGJ398  
1009 (300 nM), or a combination of both. n = 3, cell viability is normalized to the DMSO  
1010 control. Error bars represent s.d.  $p < 0.0003$ , for an unpaired T test.

1011 **(H)** Cilia percentage quantification of H1792 cells treated with or without BGJ398 for 48  
1012 hours. Note that after treatment with BGJ398 cilia percentage was reduced. n = 150,  
1013 error bars represent s.d.  $p < 0.04$ , unpaired T test.

1014 **(I)** Cell viability (Cell titer Glo) of H1792 grown in a range of trametinib concentrations.  
1015 Cell viability was normalized to DMSO control (n=3). Error bars represent s.d.

1016 **(J)** Cell viability (Cell titer Glo) of H1792 grown in a range of concentrations of BGJ398.  
1017 Cell viability was normalized to DMSO control (n=3). Error bars represent s.d.  $p < 0.0001$ ,  
1018 Tukey's multiple comparison test.

1019 **(K)** Cell viability (Cell titer Glo) of H1792 cells treated with trametinib (6.25 nM), BGJ398  
1020 (300 nM), or a combination of both. n = 3, cell viability is normalized to the DMSO  
1021 control. Error bars represent s.d.  $p < 0.0001$ , for an unpaired T test.

1022 **(L)** Cell viability (Cell titer Glo) of H2228 parental cells treated with NVP TAE (0.5  $\mu$ M),  
1023 BGJ398 (1.2  $\mu$ M), or a combination of both. Cell viability is normalized to the DMSO  
1024 control. Error bars represent s.d.  $p < 0.0001$ , for an unpaired T test.

1025 **(M)** Cell viability (Cell titer Glo) of H2228 NVP TAE resistant cells with NVP TAE (0.5  
1026  $\mu$ M), BGJ398 (1.2  $\mu$ M), or a combination of both. Cell viability is normalized to the  
1027 DMSO control. Error bars represent s.d.  $p < 0.002$ , for an unpaired T test.

1028

1029

Supplementary fig 7.

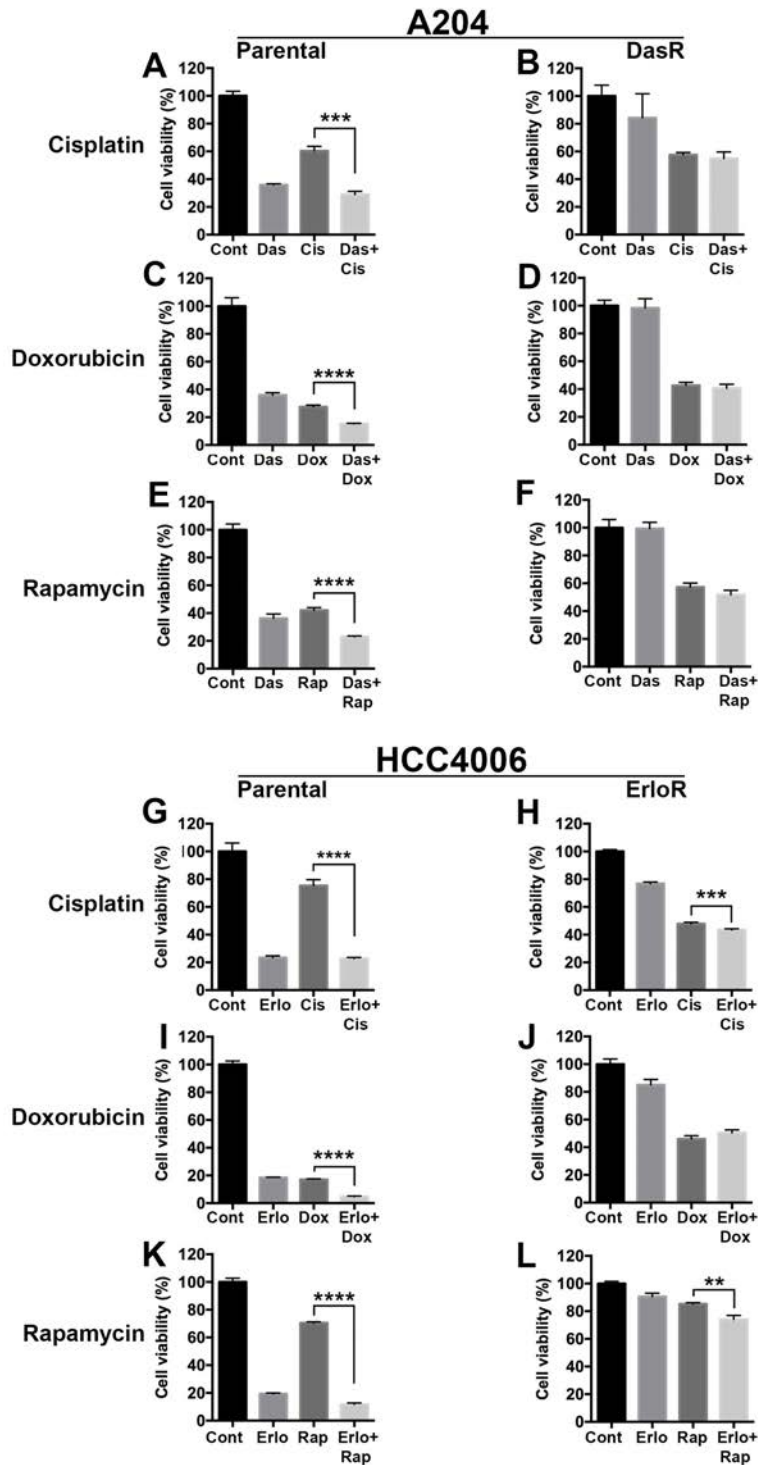

1030

1031

1032

Supplementary figure 7. Cell cycle arrest does not sensitize HCC4006 and A204

1033

kinase resistant cells to kinase inhibitors.

1034

1035 **(A, B)** Cell viability (Cell titer Glo) of A204 **(A)** and DasR **(B)** cells treated with the S  
1036 phase cell cycle inhibitor cisplatin (1  $\mu$ M), dasatinib (0.5  $\mu$ M), or a combination of both. n  
1037 = 3, cell viability is normalized to the DMSO control. Error bars represent s.d.  $p < 0.0002$   
1038 **(A)**, unpaired T test.

1039 **(C, D)** Cell viability (Cell titer Glo) of A204 **(C)** and DasR **(D)** cells treated with the G2/M  
1040 phase cell cycle inhibitor doxorubicin (0.1  $\mu$ M), dasatinib (0.5  $\mu$ M), or a combination of  
1041 both. n = 3, cell viability is normalized to the DMSO control. Error bars represent s.d.  
1042  $p < 0.0001$  **(C)**, unpaired T test.

1043 **(E, F)** Cell viability (Cell titer Glo) of A204 **(E)** and DasR **(F)** cells treated with the G1  
1044 phase cell cycle inhibitor rapamycin (0.5  $\mu$ M), dasatinib (0.5  $\mu$ M), or a combination of  
1045 both. n = 3, cell viability is normalized to the DMSO control. Error bars represent s.d.  
1046  $p < 0.0001$  **(E)**, unpaired T test.

1047 **(G, H)** Cell viability (Cell titer Glo) of HCC40006 parental **(G)** and ErloR **(H)** cells treated  
1048 with the S phase cell cycle inhibitor cisplatin (15  $\mu$ M), erlotinib (0.5  $\mu$ M), or a  
1049 combination of both. n = 4, cell viability is normalized to the DMSO control. Error bars  
1050 represent s.d.  $p < 0.0002$  **(H)**  $p < 0.0006$  **(H)**, unpaired T test.

1051 **(I, J)** Cell viability (Cell titer Glo) of HCC40006 parental **(I)** and ErloR **(J)** cells treated  
1052 with the G2/M phase cell cycle inhibitor doxorubicin (1  $\mu$ M), erlotinib (0.5  $\mu$ M), or a  
1053 combination of both. n = 3, cell viability is normalized to the DMSO control. Error bars  
1054 represent s.d.  $p < 0.0001$  **(I)**, unpaired T test.

1055 **(K, L)** Cell viability (Cell titer Glo) of HCC40006 parental **(K)** and ErloR **(L)** cells treated  
1056 with the G1 phase cell cycle inhibitor rapamycin (1  $\mu$ M), erlotinib (0.5  $\mu$ M), or a  
1057 combination of both. n = 3, cell viability is normalized to the DMSO control. Error bars  
1058 represent s.d.  $p < 0.0001$  **(K)**,  $p < 0.004$  **(L)** unpaired T test.

1059

Supplementary fig 8.

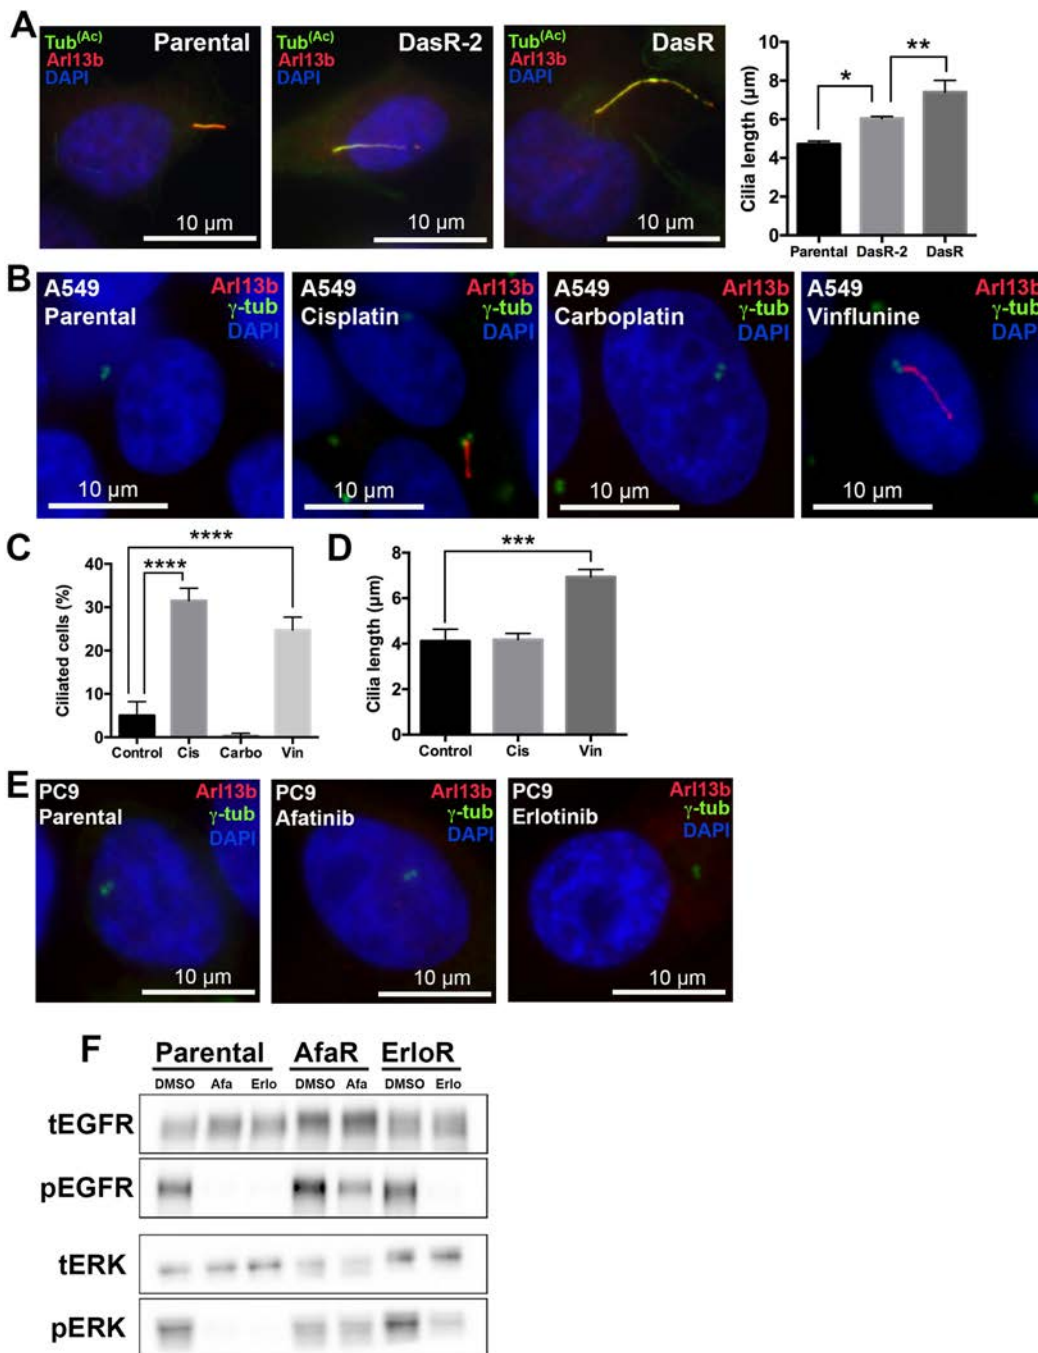

1060

1061

1062 **Supplementary figure 8. Ciliogenesis in additional models of acquired drug**

1063 **resistance.**

1064 (A) Rhabdoid tumor A204 cells and two independently derived dasatinib resistant

1065 sublines (DasR and DasR-2) were stained with acetylated tubulin to mark cilia (green),

1066 Arl13b (red) and with DAPI (blue). Cilia length quantification is shown on the right. (n =

1067 150), error bars represent the s.d.  $p < 0.02$  (parental vs DasR-2) and  $p < 0.001$  (DasR-2 vs  
1068 DasR), Tukey's multiple comparison test.

1069 **(B)** A549 parental cells and sublines resistant to cisplatin (cis), carboplatin (carbo) and  
1070 vinflunine (vin) were stained with Arl13b to mark cilia (red),  $\gamma$ -tubulin (green) and with  
1071 DAPI (blue). Note the increased ciliogenesis in sublines resistant to cisplatin and  
1072 vinflunine. **(C, D)** Quantification of ciliated cells **(C)** and cilia length **(D)** shown in **B**.  $n =$   
1073 300 **(C)**,  $n = 150$  **(D)**. Error bars represent s.d.  $p < 0.0001$  **(C)**,  $p < 0.004$  **(D)** Tukey's  
1074 multiple comparison test.

1075 **(E)** PC9 parental cells and sublines resistant to afatinib and erlotinib were stained with  
1076 arl13b to mark cilia (red),  $\gamma$ -tubulin (green) and with DAPI (blue).

1077 **(F)** Western blot showing phosphorylated EGFR, total ERFR, phosphorylated ERK and  
1078 total ERK in PC9 parental cells, afatinib (AfaR) and erlotinib (EroR) resistant sublines.  
1079 Cell were treated with or without afatinib (2  $\mu$ M) or erlotinib (1  $\mu$ M) for 3 hours when  
1080 indicated.

1081

1082

1083

1084 **Supplementary Table 1. Cell cycle distributions for experiments shown.**

1085 Note the minimal increase in cells in G0/G1 in A204 DasR, H23 and HCC4006 EroR in  
1086 response to siFT88 compared siCONT. In addition siSCLT1 (A549) and siKif7 (A204)  
1087 had minimal impact upon the cell cycle.

1088 Kinase inhibitors were tested in isogenic pairs, note the resistant sublines (HCC4006  
1089 EroR, A204 DasR and H2228 NVP TAE resistant) had minimal changes to their cell  
1090 cycle in response to their corresponding drugs (compared to DMSO controls).

1091

1092

| Cell line (condition)                                  | G0/G1 (%) | G2/M (%) | S (%) |
|--------------------------------------------------------|-----------|----------|-------|
| A204 (siCONT)                                          | 64.9      | 23.3     | 5.5   |
| A204 (siFT88)                                          | 71.0      | 20.2     | 4.79  |
| A204 DasR (siCONT)                                     | 81.3      | 13.0     | 3.86  |
| A204 DasR (siFT88)                                     | 86.4      | 9.95     | 2.42  |
| A549 (siCONT)                                          | 67.7      | 15.1     | 15.4  |
| A549 (siFT88)                                          | 72.1      | 15.2     | 11.4  |
| A549 (siSCLT1)                                         | 75.5      | 9.85     | 11.5  |
| H23 (shCONT)                                           | 62.2      | 24.4     | 11.0  |
| H23 (shFT88)                                           | 62.6      | 24.9     | 8.98  |
| HCC4006 parental (siCONT)                              | 78.2      | 10.1     | 9.46  |
| HCC4006 parental (siSCLT1)                             | 75.6      | 8.83     | 13.0  |
| HCC4006 ErloR (siCONT)                                 | 69.0      | 17.0     | 10.3  |
| HCC4006 ErloR (siSCLT1)                                | 65.0      | 19.3     | 10.7  |
| A204 parental (siCONT)                                 | 68.2      | 11.3     | 19.4  |
| A204 parental (siKif7)                                 | 69.2      | 15.2     | 14.9  |
| A204 DasR (siCONT)                                     | 83.1      | 9.52     | 5.55  |
| A204 DasR (siKif7)                                     | 84.3      | 9.97     | 4.13  |
| A204 parental (14hr DMSO control)                      | 70.3      | 20.1     | 5.57  |
| A204 parental (14hr dasatinib 5 $\mu$ M)               | 81.9      | 14.1     | 1.95  |
| A204 DasR (14hr DMSO control)                          | 80.0      | 14.2     | 3.9   |
| A204 DasR (14hr dasatinib 5 $\mu$ M)                   | 77.3      | 14.9     | 5.37  |
| HCC4006 parental (14hr DMSO control)                   | 81.6      | 10.3     | 6.04  |
| HCC4006 parental (14hr erlotinib 1 $\mu$ M)            | 87.8      | 8.86     | 2.42  |
| HCC4006 ErloR (14hr DMSO control)                      | 71.2      | 18.3     | 8.41  |
| HCC4006 ErloR (14hr erlotinib 1 $\mu$ M)               | 70.5      | 19.2     | 7.81  |
| H2228 parental (14hr DMSO control)                     | 72.4      | 12.8     | 13.6  |
| H2228 parental (14hr NVP TAE 0.5 $\mu$ M)              | 80.4      | 11.5     | 7.02  |
| H2228 NVP TAE resistant (14hr DMSO control)            | 79.7      | 10.3     | 9.44  |
| H2228 NVP TAE resistant (14hr NVP TAE 0.5 $\mu$ M)     | 82.6      | 8.5      | 8.24  |
| A204 parental (DMSO control)                           | 78.3      | 11.2     | 9.64  |
| A204 parental (BGJ398 100 nM)                          | 86.1      | 10.5     | 2.92  |
| A204 DasR (DMSO control)                               | 86.2      | 7.18     | 6.18  |
| A204 DasR (BGJ398 100 nM)                              | 94.5      | 3.01     | 2.23  |
| A204 parental (serum starved 48hr)                     | 76.2      | 17.7     | 3.59  |
| A204 DasR (serum starved 48hr)                         | 84.5      | 10.6     | 3.79  |
| HCC4006 parental (serum starved 48hr)                  | 85.2      | 8.52     | 5.03  |
| HCC4006 ErloR (serum starved 48hr)                     | 85.1      | 10.1     | 3.32  |
| H2228 parental (serum starved 48hr)                    | 78.1      | 9.4      | 11.9  |
| H2228 NVP TAE resistant (serum starved 48hr)           | 84.5      | 10.3     | 3.69  |
| HCC4006 ErloR (serum starved 48hr)                     | 86.4      | 6.22     | 6.97  |
| HCC4006 ErloR (serum starved 48hr 1 $\mu$ M erlotinib) | 86.8      | 7.28     | 5.54  |
| HCC4006 ErloR (serum starved 48hr 300nM BGJ)           | 89.3      | 5.86     | 4.6   |

1093
